# Supplementary material for: Macular Thickness Profile and Its Association With Best-Corrected Visual Acuity in Healthy Young Adults
Source: PubMed Central journal article supplement (PMC7961121; doi:10.1167/tvst.10.3.8), 2021-03-10
Supplement: tvst-10-3-8_s001.pdf [file tvst-10-3-8_s001.pdf]

**Supplementary material S2:** minimum foveal thickness (presumed foveal pit;  $\mu\text{m}$ ) in young Caucasian adults (19-30 years old), broken down by sex and axial length

| Axial length (mm) | Male   |                                                   | Female |                                                   |
|-------------------|--------|---------------------------------------------------|--------|---------------------------------------------------|
|                   | Median | 2.5 <sup>th</sup> - 97.5 <sup>th</sup> percentile | Median | 2.5 <sup>th</sup> - 97.5 <sup>th</sup> percentile |
| $\leq 22.50$      | 223.0  | 202.8 - 254.8                                     | 218.0  | 195.0 - 254.9                                     |
| 22.51 - 23.00     | 227.5  | 204.9 - 293.1                                     | 220.0  | 196.7 - 253.7                                     |
| 23.01 - 23.50     | 224.0  | 201.0 - 282.0                                     | 223.0  | 196.6 - 258.0                                     |
| 23.51 - 24.00     | 224.0  | 200.0 - 279.6                                     | 221.0  | 199.1 - 261.8                                     |
| 24.01 - 24.50     | 227.0  | 200.2 - 285.0                                     | 220.0  | 197.6 - 264.0                                     |
| $> 24.50$         | 229.5  | 203.0 - 279.0                                     | 226.0  | 200.1 - 267.0                                     |

**Supplementary material S3:** Full retinal thickness ( $\mu\text{m}$ ) at the macula in young Caucasian adults (19-30 years old), broken down by sex and axial length

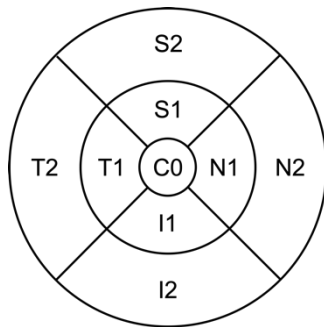

*Macular regions: C0= central macula (0.5 mm radius around the fovea), inner macula (region between 0.5 and 1.5 mm radius around the fovea; S1, T1, I1, and N1), and outer macula (regions between 1.5 and 3.0 mm radius around the fovea; S2, T2, I2, and N2).*

| Axial length (mm)        | Male   |                                                   | Female |                                                   |
|--------------------------|--------|---------------------------------------------------|--------|---------------------------------------------------|
|                          | Median | 2.5 <sup>th</sup> - 97.5 <sup>th</sup> percentile | Median | 2.5 <sup>th</sup> - 97.5 <sup>th</sup> percentile |
| <i>Macular region C0</i> |        |                                                   |        |                                                   |
| ≤ 22.50                  | 291.1  | 255.7 - 330.1                                     | 279.8  | 245.7 - 322.4                                     |
| 22.51 - 23.00            | 294.9  | 255.7 - 334.5                                     | 280.4  | 243.9 - 315.1                                     |
| 23.01 - 23.50            | 291.0  | 255.4 - 333.6                                     | 280.3  | 247.1 - 319.2                                     |
| 23.51 - 24.00            | 289.7  | 253.6 - 330.5                                     | 279.1  | 250.1 - 318.1                                     |
| 24.01 - 24.50            | 289.3  | 256.9 - 326.6                                     | 278.0  | 249.0 - 310.9                                     |
| > 24.50                  | 289.7  | 254.1 - 329.4                                     | 277.5  | 236.8 - 316.0                                     |
| <i>Macular region S1</i> |        |                                                   |        |                                                   |
| ≤ 22.50                  | 356.7  | 326.0 - 379.9                                     | 347.2  | 321.8 - 368.7                                     |
| 22.51 - 23.00            | 355.1  | 327.9 - 380.7                                     | 347.7  | 313.7 - 370.3                                     |
| 23.01 - 23.50            | 357.1  | 330.0 - 383.6                                     | 347.8  | 316.9 - 373.3                                     |
| 23.51 - 24.00            | 354.2  | 328.3 - 383.4                                     | 347.3  | 318.0 - 372.5                                     |
| 24.01 - 24.50            | 353.5  | 331.5 - 377.7                                     | 345.9  | 317.5 - 373.7                                     |
| > 24.50                  | 354.7  | 325.9 - 379.6                                     | 343.5  | 318.3 - 370.6                                     |
| <i>Macular region S2</i> |        |                                                   |        |                                                   |
| ≤ 22.50                  | 303.8  | 276.9 - 331.6                                     | 297.8  | 274.2 - 323.8                                     |
| 22.51 - 23.00            | 300.7  | 278.2 - 323.4                                     | 299.3  | 275.1 - 322.5                                     |
| 23.01 - 23.50            | 302.6  | 276.4 - 328.1                                     | 299.9  | 272.5 - 323.5                                     |
| 23.51 - 24.00            | 302.2  | 277.5 - 325.2                                     | 299.3  | 275.6 - 325.2                                     |
| 24.01 - 24.50            | 302.1  | 276.8 - 323.7                                     | 300.1  | 278.6 - 327.5                                     |
| > 24.50                  | 303.2  | 270.1 - 326.3                                     | 297.3  | 274.2 - 319.6                                     |
| <i>Macular region I1</i> |        |                                                   |        |                                                   |
| ≤ 22.50                  | 353.9  | 323.8 - 376.8                                     | 339.1  | 320.0 - 369.7                                     |
| 22.51 - 23.00            | 352.1  | 319.6 - 375.5                                     | 344.0  | 316.3 - 369.2                                     |
| 23.01 - 23.50            | 353.9  | 328.7 - 380.2                                     | 342.6  | 314.6 - 371.5                                     |
| 23.51 - 24.00            | 351.5  | 322.8 - 376.5                                     | 343.3  | 314.5 - 370.2                                     |
| 24.01 - 24.50            | 350.1  | 322.6 - 373.3                                     | 341.9  | 314.4 - 365.3                                     |
| > 24.50                  | 352.1  | 322.4 - 374.3                                     | 338.8  | 312.9 - 365.6                                     |

Full retinal thickness (cont.)

| Axial length (mm)        | Male   |                                                      | Female |                                                      |
|--------------------------|--------|------------------------------------------------------|--------|------------------------------------------------------|
|                          | Median | 2.5 <sup>th</sup> - 97.5 <sup>th</sup><br>percentile | Median | 2.5 <sup>th</sup> - 97.5 <sup>th</sup><br>percentile |
| <i>Macular region I2</i> |        |                                                      |        |                                                      |
| ≤ 22.50                  | 293.0  | 269.8 - 317.0                                        | 288.7  | 265.3 - 312.5                                        |
| 22.51 - 23.00            | 290.5  | 266.2 - 318.1                                        | 291.0  | 265.4 - 316.8                                        |
| 23.01 - 23.50            | 294.0  | 266.0 - 317.2                                        | 290.4  | 263.2 - 316.1                                        |
| 23.51 - 24.00            | 291.2  | 265.5 - 318.9                                        | 290.1  | 265.0 - 315.3                                        |
| 24.01 - 24.50            | 291.5  | 263.8 - 316.1                                        | 291.3  | 267.4 - 317.7                                        |
| > 24.50                  | 292.6  | 262.3 - 316.3                                        | 288.8  | 265.6 - 312.6                                        |
| <i>Macular region T1</i> |        |                                                      |        |                                                      |
| ≤ 22.50                  | 343.7  | 319.1 - 365.8                                        | 330.3  | 305.4 - 355.9                                        |
| 22.51 - 23.00            | 343.3  | 316.9 - 367.8                                        | 331.9  | 306.4 - 358.5                                        |
| 23.01 - 23.50            | 343.8  | 316.1 - 369.0                                        | 331.9  | 303.8 - 358.2                                        |
| 23.51 - 24.00            | 341.8  | 315.4 - 368.8                                        | 332.4  | 305.7 - 355.4                                        |
| 24.01 - 24.50            | 338.9  | 313.1 - 361.2                                        | 331.5  | 305.0 - 356.2                                        |
| > 24.50                  | 341.0  | 315.2 - 363.5                                        | 329.0  | 305.5 - 353.2                                        |
| <i>Macular region T2</i> |        |                                                      |        |                                                      |
| ≤ 22.50                  | 289.0  | 265.7 - 307.8                                        | 279.4  | 255.2 - 305.2                                        |
| 22.51 - 23.00            | 286.7  | 264.8 - 311.0                                        | 281.0  | 253.0 - 301.6                                        |
| 23.01 - 23.50            | 290.4  | 265.8 - 313.0                                        | 280.6  | 257.0 - 303.4                                        |
| 23.51 - 24.00            | 288.2  | 262.6 - 310.0                                        | 281.8  | 260.0 - 302.3                                        |
| 24.01 - 24.50            | 288.9  | 265.1 - 308.3                                        | 281.1  | 259.3 - 304.9                                        |
| > 24.50                  | 289.1  | 261.7 - 312.7                                        | 280.1  | 262.2 - 304.9                                        |
| <i>Macular region N1</i> |        |                                                      |        |                                                      |
| ≤ 22.50                  | 361.7  | 329.7 - 390.3                                        | 349.7  | 329.8 - 378.6                                        |
| 22.51 - 23.00            | 359.2  | 331.5 - 386.0                                        | 349.6  | 323.0 - 377.3                                        |
| 23.01 - 23.50            | 361.0  | 335.9 - 387.1                                        | 350.0  | 322.4 - 377.7                                        |
| 23.51 - 24.00            | 358.5  | 331.0 - 387.2                                        | 349.5  | 324.4 - 378.1                                        |
| 24.01 - 24.50            | 355.7  | 334.2 - 383.3                                        | 348.9  | 320.4 - 373.9                                        |
| > 24.50                  | 358.3  | 329.5 - 380.7                                        | 344.7  | 319.4 - 373.9                                        |
| <i>Macular region N2</i> |        |                                                      |        |                                                      |
| ≤ 22.50                  | 324.8  | 288.4 - 354.8                                        | 320.0  | 293.4 - 357.4                                        |
| 22.51 - 23.00            | 322.9  | 292.0 - 354.9                                        | 321.7  | 291.3 - 350.4                                        |
| 23.01 - 23.50            | 324.4  | 295.6 - 353.3                                        | 321.8  | 290.3 - 350.7                                        |
| 23.51 - 24.00            | 323.1  | 292.3 - 352.9                                        | 320.4  | 294.8 - 347.8                                        |
| 24.01 - 24.50            | 323.3  | 296.8 - 350.9                                        | 319.1  | 295.3 - 352.6                                        |
| > 24.50                  | 323.9  | 296.9 - 349.8                                        | 314.8  | 289.8 - 346.0                                        |

**Supplementary material S4:** Outer retinal layers thickness ( $\mu\text{m}$ ) at the macula in young Caucasian adults (19-30 years old), broken down by sex and axial length



*Macular regions: C0= central macula (0.5 mm radius around the fovea), inner macula (region between 0.5 and 1.5 mm radius around the fovea; S1, T1, I1, and N1), and outer macula (regions between 1.5 and 3.0 mm radius around the fovea; S2, T2, I2, and N2).*

| Axial length (mm)        | Male   |                                                   | Female |                                                   |
|--------------------------|--------|---------------------------------------------------|--------|---------------------------------------------------|
|                          | Median | 2.5 <sup>th</sup> - 97.5 <sup>th</sup> percentile | Median | 2.5 <sup>th</sup> - 97.5 <sup>th</sup> percentile |
| <i>Macular region C0</i> |        |                                                   |        |                                                   |
| ≤ 22.50                  | 93.2   | 84.3 - 99.0                                       | 91.9   | 84.3 - 100.1                                      |
| 22.51 - 23.00            | 91.6   | 83.8 - 99.6                                       | 1.1    | 84.0 - 99.5                                       |
| 23.01 - 23.50            | 92.6   | 83.4 - 100.4                                      | 91.9   | 84.3 - 100.3                                      |
| 23.51 - 24.00            | 92.6   | 82.7 - 101.6                                      | 91.0   | 83.0 - 99.2                                       |
| 24.01 - 24.50            | 102.0  | 90.9 - 112.9                                      | 91.0   | 83.2 - 99.8                                       |
| > 24.50                  | 91.7   | 84.2 - 99.2                                       | 91.2   | 83.2 - 98.5                                       |
| <i>Macular region S1</i> |        |                                                   |        |                                                   |
| ≤ 22.50                  | 81.2   | 76.5 - 86.1                                       | 81.0   | 76.6 - 85.4                                       |
| 22.51 - 23.00            | 81.7   | 76.7 - 85.2                                       | 80.5   | 76.4 - 86.1                                       |
| 23.01 - 23.50            | 81.6   | 77.1 - 86.6                                       | 81.3   | 76.5 - 86.8                                       |
| 23.51 - 24.00            | 81.4   | 77.0 - 86.5                                       | 81.2   | 76.1 - 85.3                                       |
| 24.01 - 24.50            | 81.1   | 77.0 - 86.0                                       | 80.7   | 75.2 - 86.1                                       |
| > 24.50                  | 81.5   | 76.8 - 86.8                                       | 80.4   | 76.1 - 86.4                                       |
| <i>Macular region S2</i> |        |                                                   |        |                                                   |
| ≤ 22.50                  | 79.5   | 74.8 - 82.8                                       | 78.8   | 74.6 - 83.8                                       |
| 22.51 - 23.00            | 79.2   | 76.0 - 83.0                                       | 78.2   | 74.5 - 83.8                                       |
| 23.01 - 23.50            | 79.4   | 75.4 - 84.6                                       | 78.9   | 74.4 - 83.8                                       |
| 23.51 - 24.00            | 79.2   | 75.5 - 83.9                                       | 79.1   | 74.4 - 83.3                                       |
| 24.01 - 24.50            | 79.3   | 75.3 - 83.7                                       | 78.8   | 73.9 - 83.1                                       |
| > 24.50                  | 79.5   | 75.4 - 84.9                                       | 78.4   | 74.8 - 82.9                                       |
| <i>Macular region I1</i> |        |                                                   |        |                                                   |
| ≤ 22.50                  | 80.2   | 76.1 - 84.1                                       | 80.0   | 75.5 - 86.8                                       |
| 22.51 - 23.00            | 81.0   | 76.3 - 86.1                                       | 79.7   | 75.5 - 85.6                                       |
| 23.01 - 23.50            | 81.1   | 76.0 - 86.9                                       | 80.4   | 76.0 - 85.1                                       |
| 23.51 - 24.00            | 80.6   | 76.6 - 86.1                                       | 80.1   | 75.8 - 85.6                                       |
| 24.01 - 24.50            | 80.3   | 76.4 - 85.7                                       | 79.9   | 76.2 - 85.0                                       |
| > 24.50                  | 81.0   | 76.9 - 87.2                                       | 79.7   | 75.5 - 84.5                                       |

Outer retinal layers thickness (cont.)

| Axial length (mm)        | Male   |                                                      | Female |                                                      |
|--------------------------|--------|------------------------------------------------------|--------|------------------------------------------------------|
|                          | Median | 2.5 <sup>th</sup> - 97.5 <sup>th</sup><br>percentile | Median | 2.5 <sup>th</sup> - 97.5 <sup>th</sup><br>percentile |
| <i>Macular region I2</i> |        |                                                      |        |                                                      |
| ≤ 22.50                  | 77.2   | 74.1 - 81.1                                          | 76.5   | 73.3 - 81.8                                          |
| 22.51 - 23.00            | 77.2   | 73.9 - 82.7                                          | 76.4   | 73.4 - 82.2                                          |
| 23.01 - 23.50            | 77.3   | 74.1 - 82.6                                          | 76.7   | 73.6 - 82.6                                          |
| 23.51 - 24.00            | 77.4   | 73.9 - 82.9                                          | 77.1   | 73.6 - 82.5                                          |
| 24.01 - 24.50            | 77.6   | 73.8 - 82.0                                          | 76.7   | 73.4 - 82.0                                          |
| > 24.50                  | 77.8   | 74.3 - 83.2                                          | 76.9   | 73.5 - 80.7                                          |
| <i>Macular region T1</i> |        |                                                      |        |                                                      |
| ≤ 22.50                  | 82.8   | 78.2 - 88.7                                          | 82.0   | 77.0 - 89.3                                          |
| 22.51 - 23.00            | 82.5   | 78.4 - 88.1                                          | 81.5   | 76.7 - 86.9                                          |
| 23.01 - 23.50            | 83.0   | 78.1 - 88.5                                          | 82.4   | 77.0 - 88.1                                          |
| 23.51 - 24.00            | 82.7   | 77.5 - 89.3                                          | 82.1   | 76.9 - 87.7                                          |
| 24.01 - 24.50            | 82.5   | 77.4 - 87.1                                          | 82.0   | 76.4 - 87.6                                          |
| > 24.50                  | 82.6   | 78.4 - 87.7                                          | 81.9   | 77.5 - 87.5                                          |
| <i>Macular region T2</i> |        |                                                      |        |                                                      |
| ≤ 22.50                  | 77.9   | 74.5 - 81.9                                          | 77.6   | 74.1 - 83.3                                          |
| 22.51 - 23.00            | 77.9   | 74.5 - 81.8                                          | 77.3   | 73.5 - 82.2                                          |
| 23.01 - 23.50            | 78.2   | 73.8 - 82.7                                          | 77.8   | 73.8 - 82.5                                          |
| 23.51 - 24.00            | 78.0   | 74.1 - 82.8                                          | 77.8   | 74.0 - 81.6                                          |
| 24.01 - 24.50            | 77.7   | 74.0 - 82.0                                          | 77.8   | 73.6 - 81.3                                          |
| > 24.50                  | 78.3   | 74.4 - 83.3                                          | 77.2   | 74.0 - 81.4                                          |
| <i>Macular region N1</i> |        |                                                      |        |                                                      |
| ≤ 22.50                  | 83.7   | 78.5 - 88.8                                          | 82.7   | 77.0 - 87.9                                          |
| 22.51 - 23.00            | 83.3   | 79.5 - 88.2                                          | 82.6   | 77.8 - 88.3                                          |
| 23.01 - 23.50            | 83.8   | 78.3 - 88.9                                          | 83.5   | 78.1 - 89.6                                          |
| 23.51 - 24.00            | 83.6   | 78.7 - 89.3                                          | 83.0   | 77.8 - 88.5                                          |
| 24.01 - 24.50            | 83.6   | 78.7 - 88.2                                          | 83.3   | 77.8 - 88.5                                          |
| > 24.50                  | 83.3   | 79.1 - 88.6                                          | 82.7   | 77.8 - 88.0                                          |
| <i>Macular region N2</i> |        |                                                      |        |                                                      |
| ≤ 22.50                  | 78.9   | 74.3 - 83.2                                          | 78.1   | 74.1 - 83.1                                          |
| 22.51 - 23.00            | 79.3   | 74.9 - 84.1                                          | 78.0   | 74.2 - 83.3                                          |
| 23.01 - 23.50            | 79.4   | 75.0 - 84.6                                          | 78.8   | 74.8 - 83.7                                          |
| 23.51 - 24.00            | 79.2   | 74.9 - 84.0                                          | 78.8   | 74.2 - 83.8                                          |
| 24.01 - 24.50            | 79.3   | 75.0 - 83.2                                          | 78.6   | 74.6 - 82.7                                          |
| > 24.50                  | 79.8   | 75.4 - 84.9                                          | 78.3   | 74.2 - 83.2                                          |

**Supplementary material S5:** Ganglion cell + inner plexiform layers thickness ( $\mu\text{m}$ ) at the macula in young Caucasian adults (19-30 years old), broken down by sex and axial length



*Macular regions: C0= central macula (0.5 mm radius around the fovea), inner macula (region between 0.5 and 1.5 mm radius around the fovea; S1, T1, I1, and N1), and outer macula (regions between 1.5 and 3.0 mm radius around the fovea; S2, T2, I2, and N2).*

| Axial length (mm)                    | Male   |                                                   | Female |                                                   |
|--------------------------------------|--------|---------------------------------------------------|--------|---------------------------------------------------|
|                                      | Median | 2.5 <sup>th</sup> - 97.5 <sup>th</sup> percentile | Median | 2.5 <sup>th</sup> - 97.5 <sup>th</sup> percentile |
| <i>Macular region C0<sup>#</sup></i> |        |                                                   |        |                                                   |
| ≤ 22.50                              | -      | -                                                 | -      | -                                                 |
| 22.51 - 23.00                        | -      | -                                                 | -      | -                                                 |
| 23.01 - 23.50                        | -      | -                                                 | -      | -                                                 |
| 23.51 - 24.00                        | -      | -                                                 | -      | -                                                 |
| 24.01 - 24.50                        | -      | -                                                 | -      | -                                                 |
| > 24.50                              | -      | -                                                 | -      | -                                                 |
| <i>Macular region S1</i>             |        |                                                   |        |                                                   |
| ≤ 22.50                              | 98.9   | 80.9 - 110.1                                      | 94.9   | 78.8 - 108.1                                      |
| 22.51 - 23.00                        | 97.9   | 82.0 - 110.5                                      | 95.6   | 82.1 - 108.3                                      |
| 23.01 - 23.50                        | 99.2   | 87.4 - 112.9                                      | 95.2   | 82.9 - 108.0                                      |
| 23.51 - 24.00                        | 99.1   | 83.9 - 110.3                                      | 95.5   | 81.1 - 106.6                                      |
| 24.01 - 24.50                        | 99.2   | 87.3 - 110.6                                      | 94.8   | 84.7 - 107.3                                      |
| > 24.50                              | 99.3   | 85.0 - 111.3                                      | 94.7   | 83.1 - 107.9                                      |
| <i>Macular region S2</i>             |        |                                                   |        |                                                   |
| ≤ 22.50                              | 60.5   | 49.5 - 71.1                                       | 58.3   | 48.9 - 67.9                                       |
| 22.51 - 23.00                        | 60.2   | 51.9 - 71.6                                       | 59.5   | 48.8 - 68.3                                       |
| 23.01 - 23.50                        | 60.6   | 50.7 - 71.9                                       | 59.5   | 49.9 - 69.2                                       |
| 23.51 - 24.00                        | 61.5   | 51.1 - 70.3                                       | 60.0   | 49.8 - 70.2                                       |
| 24.01 - 24.50                        | 61.4   | 52.4 - 72.1                                       | 59.6   | 50.9 - 69.4                                       |
| > 24.50                              | 61.9   | 50.8 - 72.7                                       | 60.2   | 50.6 - 71.1                                       |
| <i>Macular region I1</i>             |        |                                                   |        |                                                   |
| ≤ 22.50                              | 99.2   | 82.4 - 109.0                                      | 93.9   | 77.6 - 107.1                                      |
| 22.51 - 23.00                        | 98.3   | 80.4 - 109.3                                      | 94.9   | 83.5 - 107.4                                      |
| 23.01 - 23.50                        | 98.8   | 88.4 - 110.9                                      | 94.8   | 82.6 - 107.8                                      |
| 23.51 - 24.00                        | 98.3   | 84.5 - 108.8                                      | 95.0   | 80.5 - 106.9                                      |
| 24.01 - 24.50                        | 98.2   | 86.6 - 110.4                                      | 94.8   | 84.0 - 107.3                                      |
| > 24.50                              | 99.3   | 81.9 - 110.1                                      | 94.5   | 81.4 - 106.9                                      |

<sup>#</sup> GC IPL not present/measurable at central macular

Ganglion cell + inner plexiform layers thickness (*cont.*)

| Axial length (mm)        | Male   |                                                      | Female |                                                      |
|--------------------------|--------|------------------------------------------------------|--------|------------------------------------------------------|
|                          | Median | 2.5 <sup>th</sup> - 97.5 <sup>th</sup><br>percentile | Median | 2.5 <sup>th</sup> - 97.5 <sup>th</sup><br>percentile |
| <i>Macular region I2</i> |        |                                                      |        |                                                      |
| ≤ 22.50                  | 56.7   | 46.4 - 70.6                                          | 55.8   | 44.8 - 65.8                                          |
| 22.51 - 23.00            | 57.0   | 47.0 - 71.5                                          | 57.2   | 47.6 - 67.4                                          |
| 23.01 - 23.50            | 57.8   | 49.2 - 70.0                                          | 56.8   | 48.4 - 68.5                                          |
| 23.51 - 24.00            | 57.5   | 49.1 - 68.3                                          | 57.1   | 47.7 - 67.7                                          |
| 24.01 - 24.50            | 58.1   | 49.9 - 67.6                                          | 57.3   | 49.4 - 67.0                                          |
| > 24.50                  | 59.3   | 48.0 - 70.0                                          | 57.6   | 48.0 - 69.9                                          |
| <i>Macular region T1</i> |        |                                                      |        |                                                      |
| ≤ 22.50                  | 95.6   | 79.5 - 106.5                                         | 90.2   | 75.6 - 103.5                                         |
| 22.51 - 23.00            | 95.4   | 80.1 - 107.9                                         | 91.3   | 77.0 - 106.0                                         |
| 23.01 - 23.50            | 96.8   | 82.7 - 109.2                                         | 91.4   | 76.7 - 105.1                                         |
| 23.51 - 24.00            | 95.9   | 81.1 - 108.0                                         | 91.4   | 76.3 - 104.5                                         |
| 24.01 - 24.50            | 96.3   | 83.9 - 106.6                                         | 91.0   | 79.7 - 104.5                                         |
| > 24.50                  | 95.3   | 81.7 - 107.0                                         | 90.9   | 78.4 - 103.4                                         |
| <i>Macular region T2</i> |        |                                                      |        |                                                      |
| ≤ 22.50                  | 68.3   | 55.4 - 81.9                                          | 64.5   | 49.9 - 77.7                                          |
| 22.51 - 23.00            | 68.0   | 54.3 - 82.1                                          | 66.1   | 54.9 - 76.5                                          |
| 23.01 - 23.50            | 68.9   | 57.0 - 80.8                                          | 65.9   | 56.0 - 77.0                                          |
| 23.51 - 24.00            | 69.4   | 55.4 - 78.8                                          | 66.8   | 55.9 - 77.3                                          |
| 24.01 - 24.50            | 69.8   | 58.6 - 80.3                                          | 66.4   | 56.6 - 80.5                                          |
| > 24.50                  | 69.6   | 54.2 - 83.7                                          | 67.4   | 56.5 - 80.5                                          |
| <i>Macular region N1</i> |        |                                                      |        |                                                      |
| ≤ 22.50                  | 102.9  | 86.7 - 112.6                                         | 98.3   | 84.1 - 110.0                                         |
| 22.51 - 23.00            | 101.2  | 86.5 - 112.3                                         | 98.6   | 88.1 - 112.7                                         |
| 23.01 - 23.50            | 103.3  | 91.0 - 114.7                                         | 98.0   | 86.9 - 110.7                                         |
| 23.51 - 24.00            | 101.8  | 86.2 - 113.1                                         | 97.9   | 86.8 - 110.3                                         |
| 24.01 - 24.50            | 102.0  | 90.9 - 112.9                                         | 97.7   | 86.5 - 112.5                                         |
| > 24.50                  | 101.7  | 89.1 - 112.1                                         | 96.7   | 85.8 - 111.0                                         |
| <i>Macular region N2</i> |        |                                                      |        |                                                      |
| ≤ 22.50                  | 64.4   | 52.5 - 78.7                                          | 61.7   | 51.3 - 74.7                                          |
| 22.51 - 23.00            | 64.0   | 53.5 - 79.2                                          | 63.5   | 54.5 - 74.5                                          |
| 23.01 - 23.50            | 64.9   | 54.2 - 75.9                                          | 64.5   | 53.9 - 76.2                                          |
| 23.51 - 24.00            | 65.7   | 51.5 - 75.7                                          | 64.1   | 54.3 - 75.4                                          |
| 24.01 - 24.50            | 66.7   | 56.9 - 78.4                                          | 64.2   | 54.7 - 73.9                                          |
| > 24.50                  | 66.6   | 54.8 - 79.0                                          | 64.8   | 54.6 - 76.6                                          |
