# Supplementary material for: Macular Thickness Profile and Its Association With Best-Corrected Visual Acuity in Healthy Young Adults
Source: PubMed Central journal article supplement (PMC7961121; doi:10.1167/tvst.10.3.8), 2021-03-10
Supplement: tvst-10-3-8_s002.pdf [file tvst-10-3-8_s002.pdf]

### Median and 95% Confidence interval

(A) Full retina

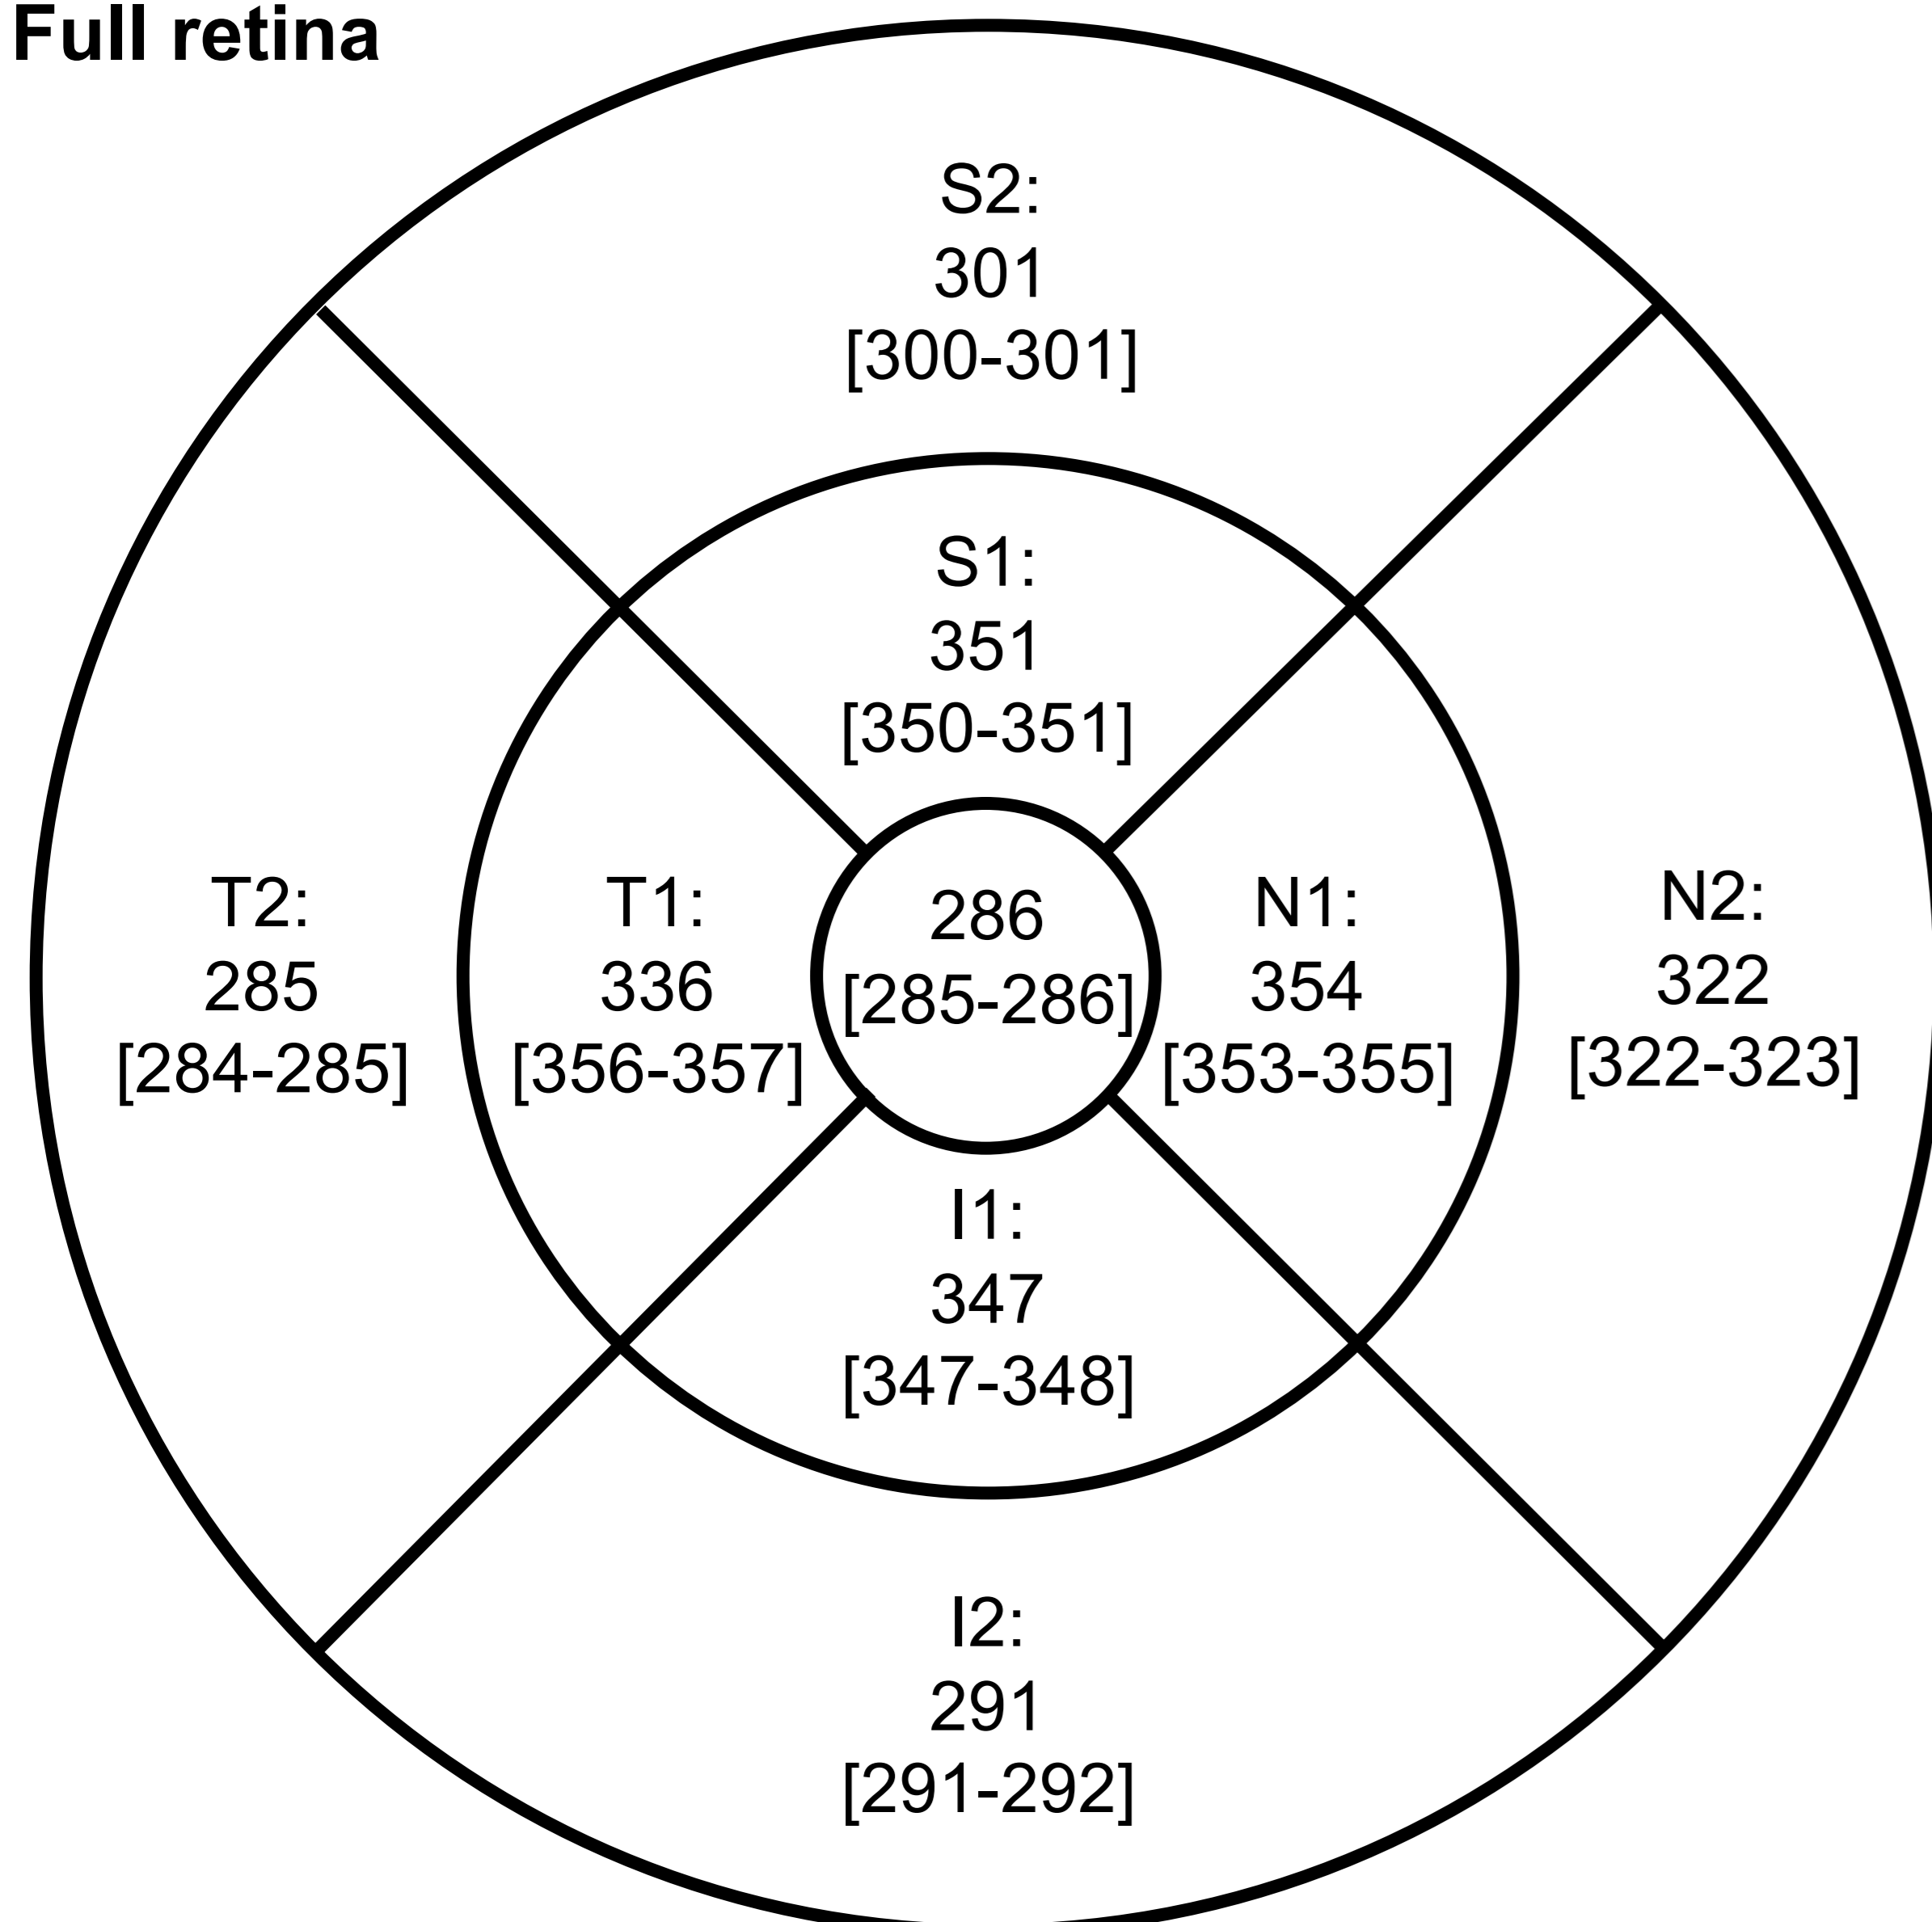

(C) Outer retinal layers

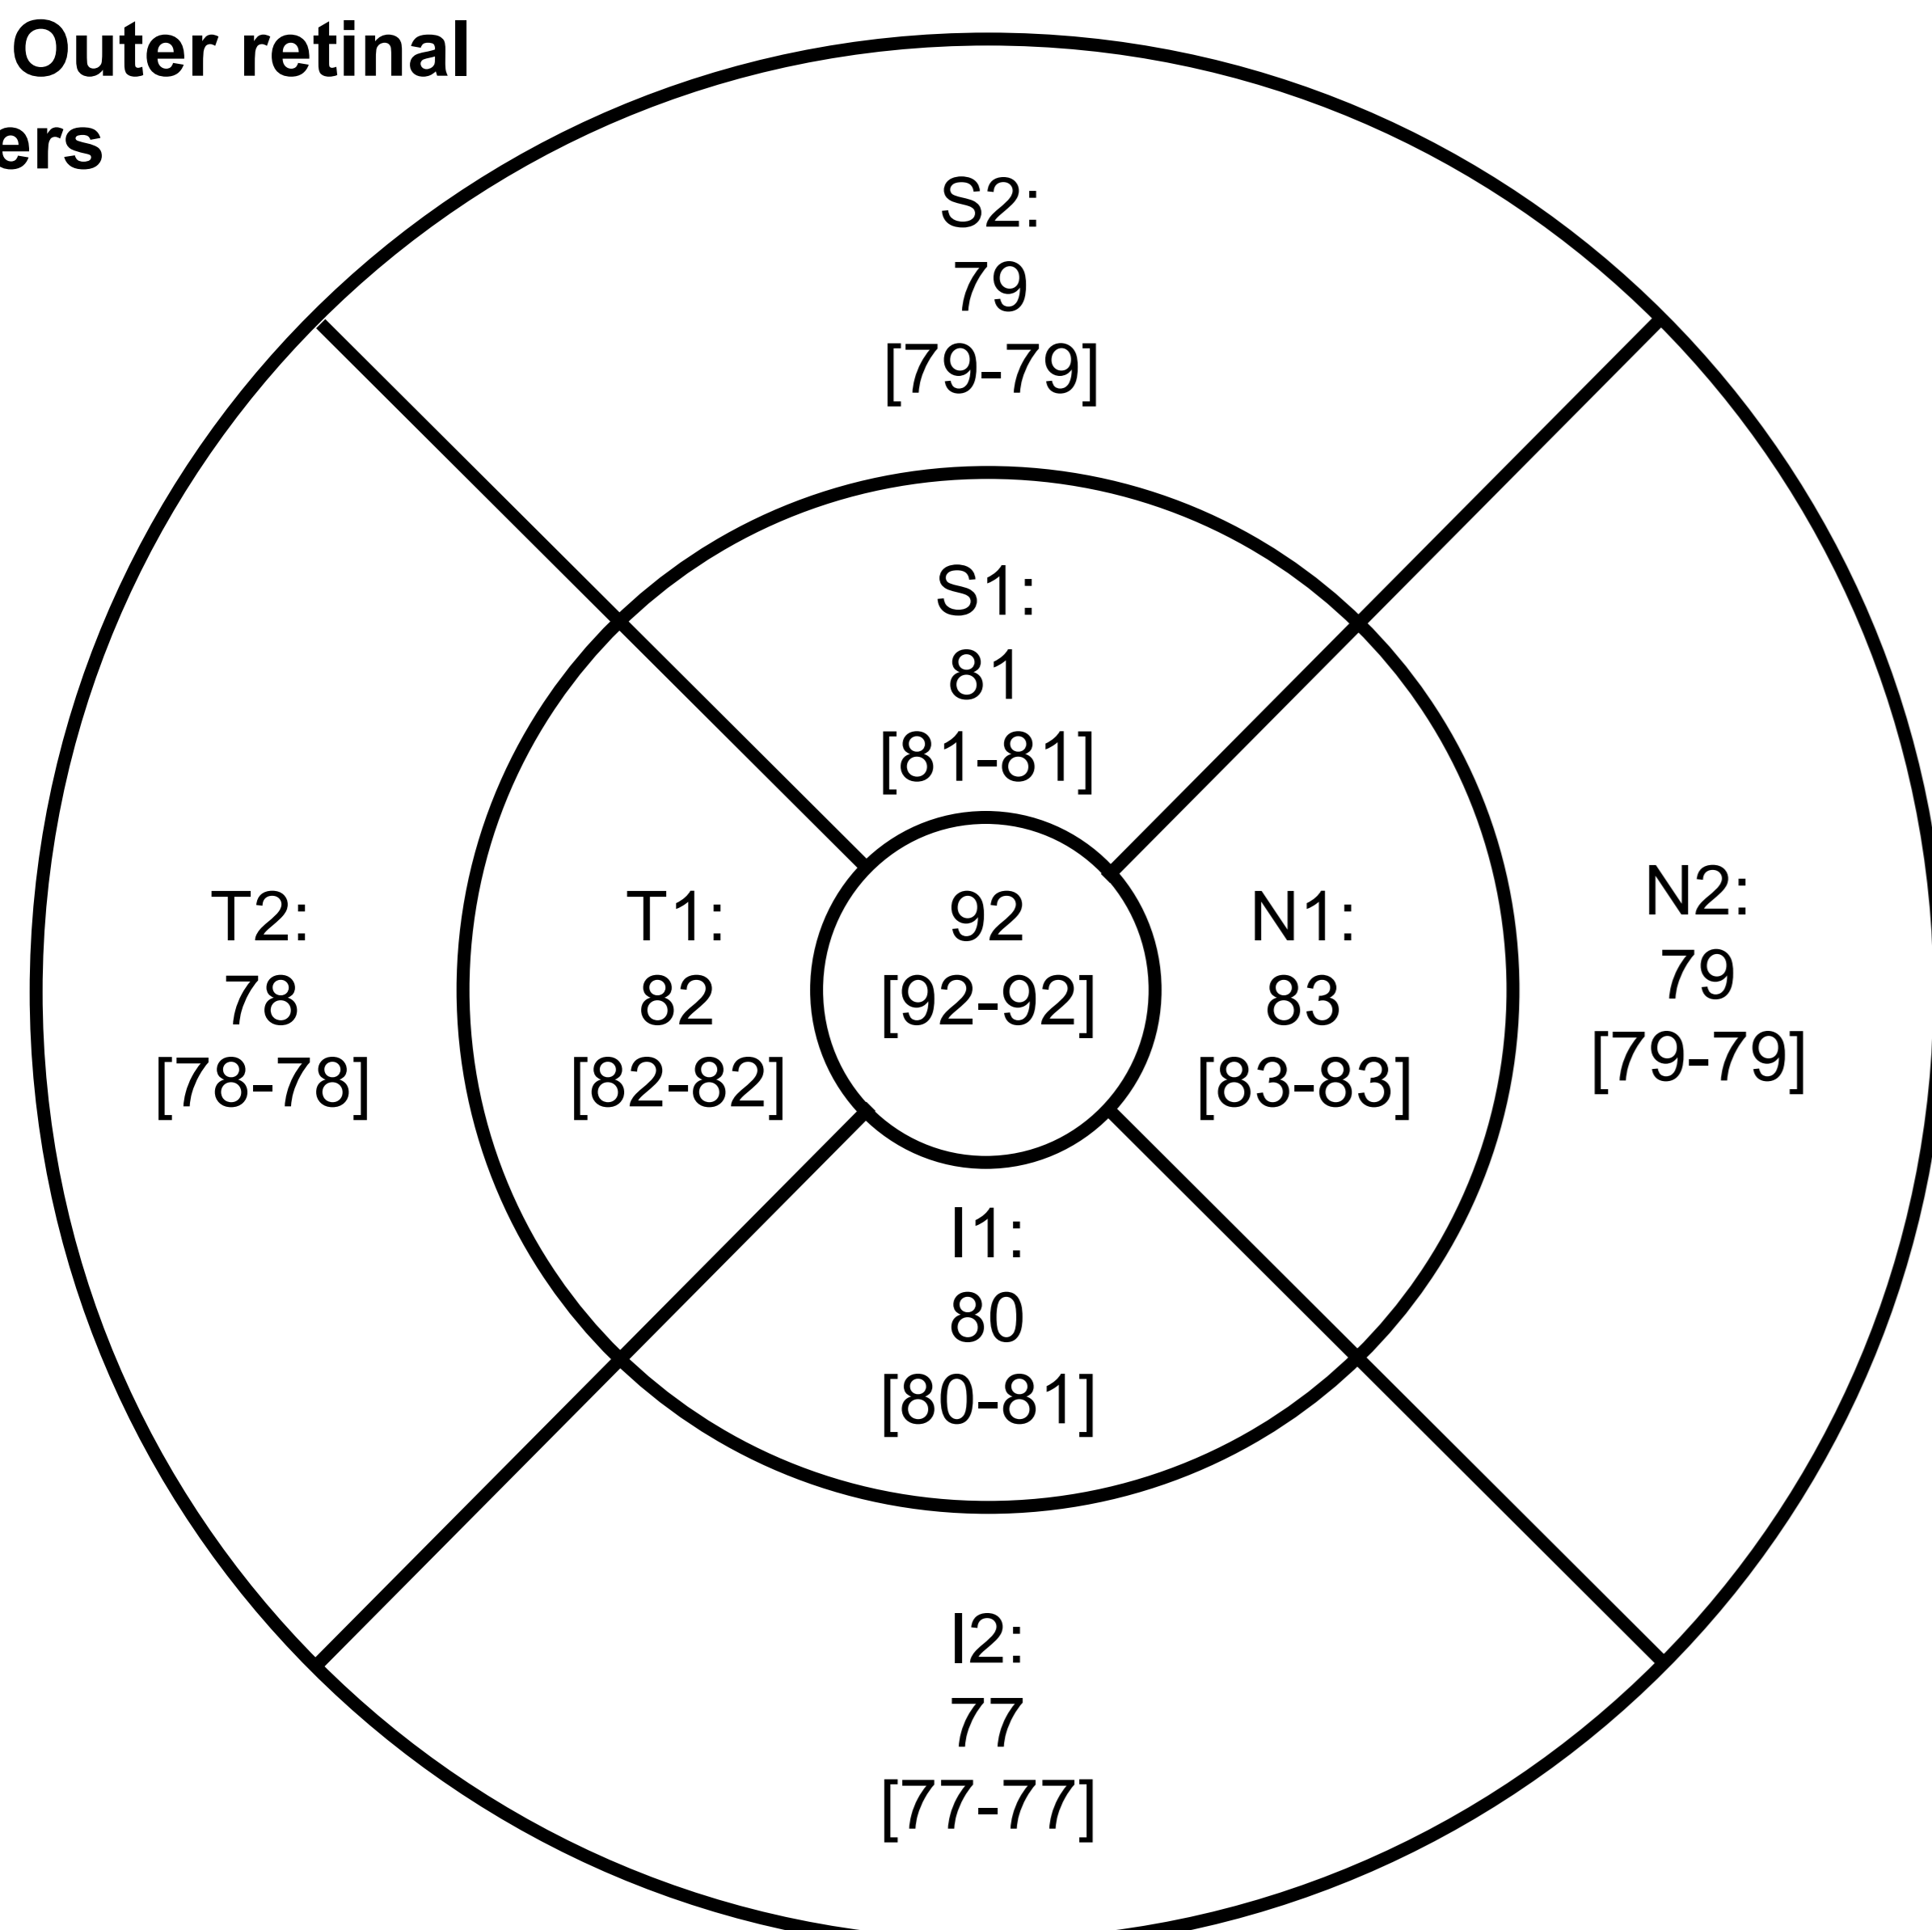

(B) Ganglion cell-inner plexiform layer

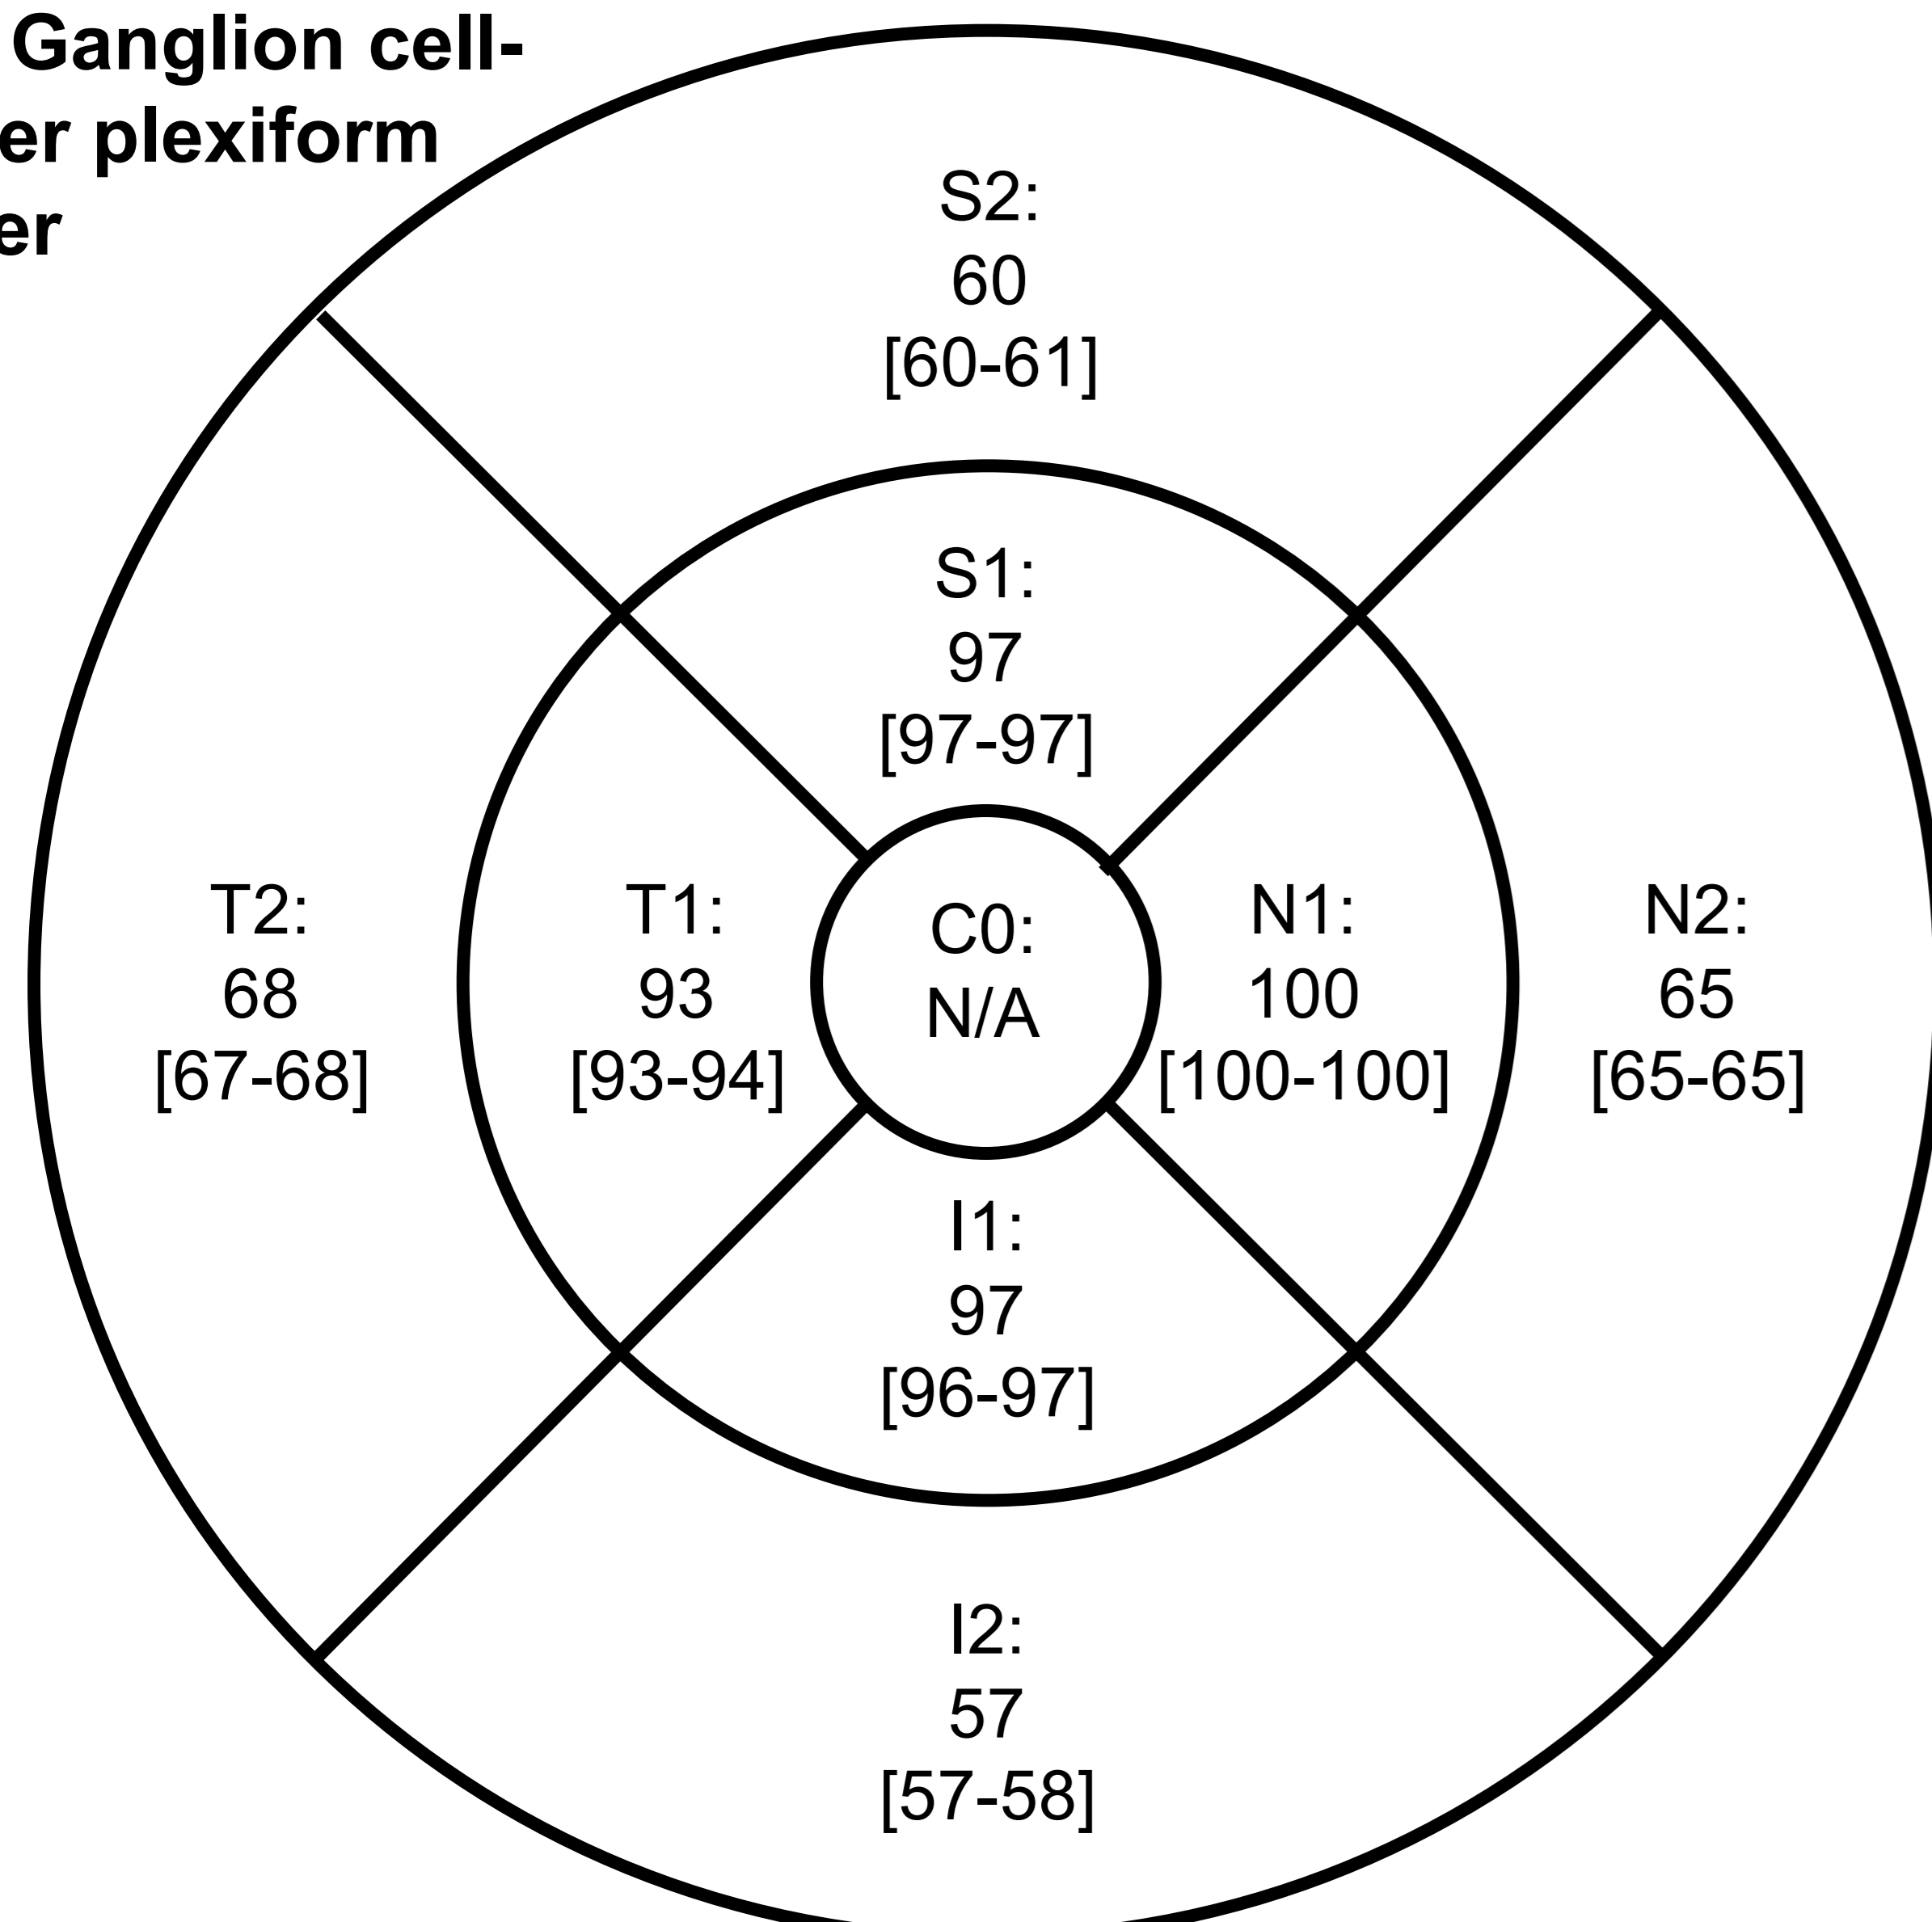

### Interquartile range

(A) Full retina

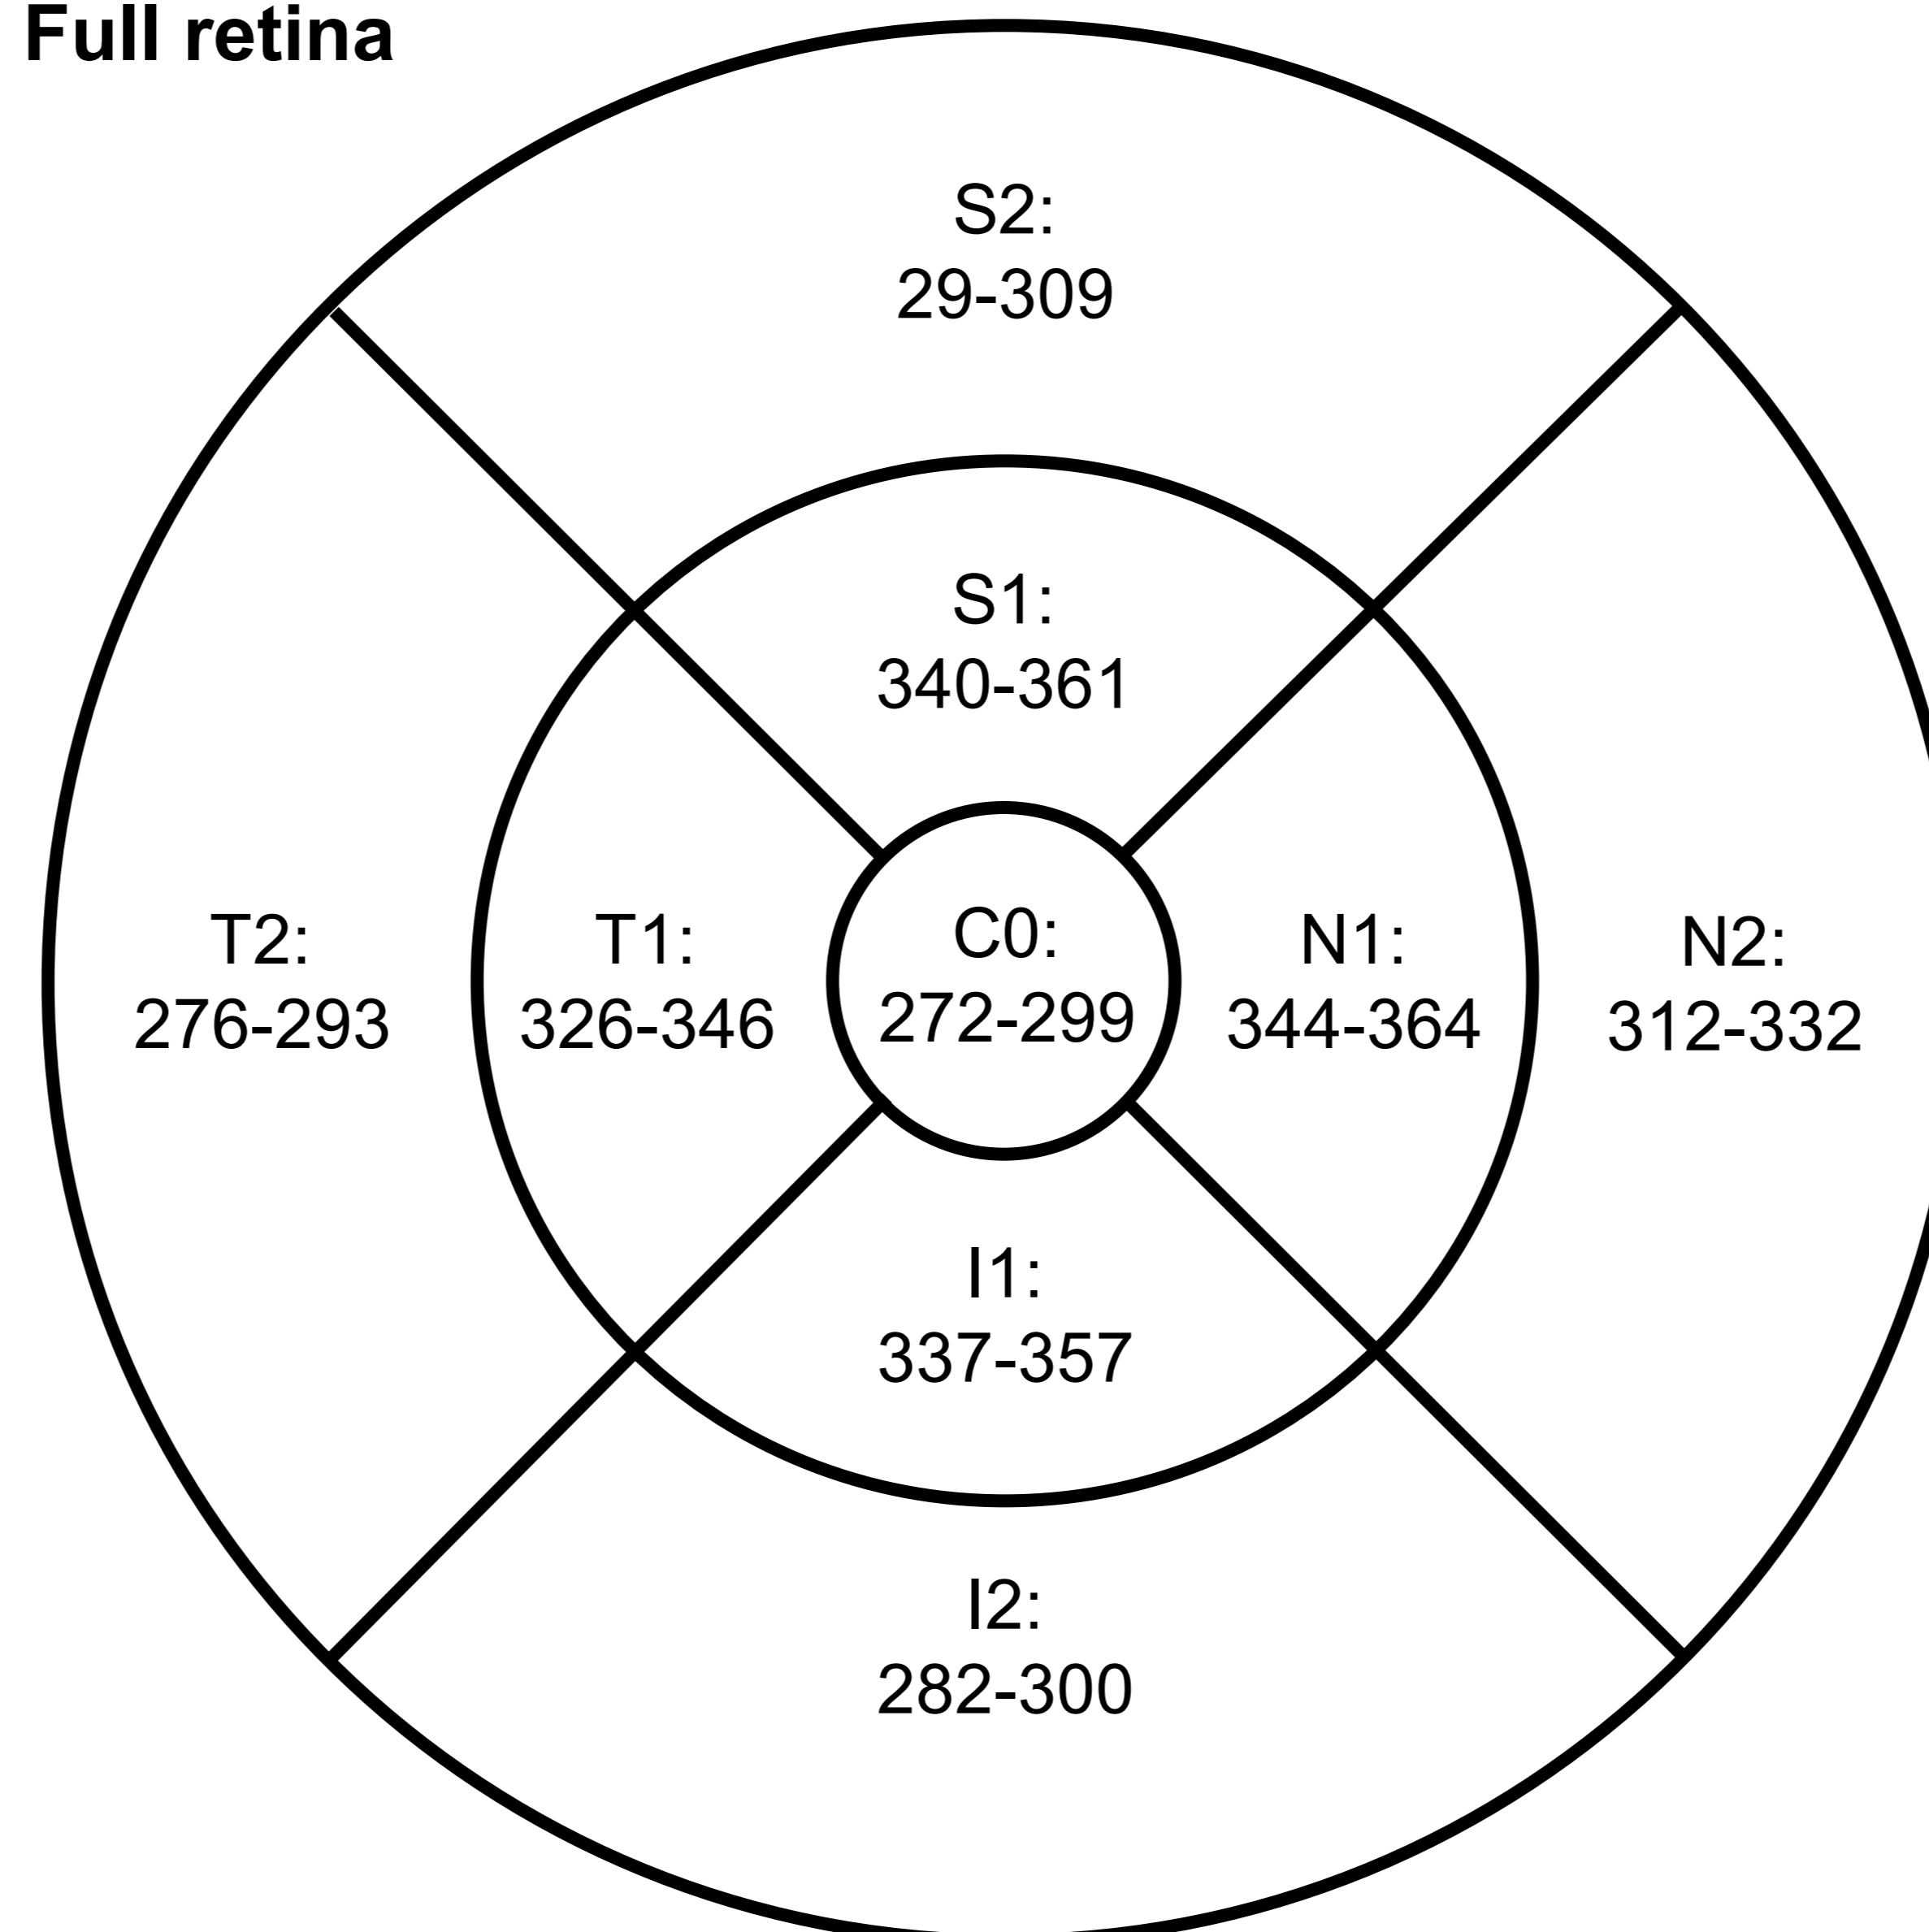

(C) Outer retinal layers

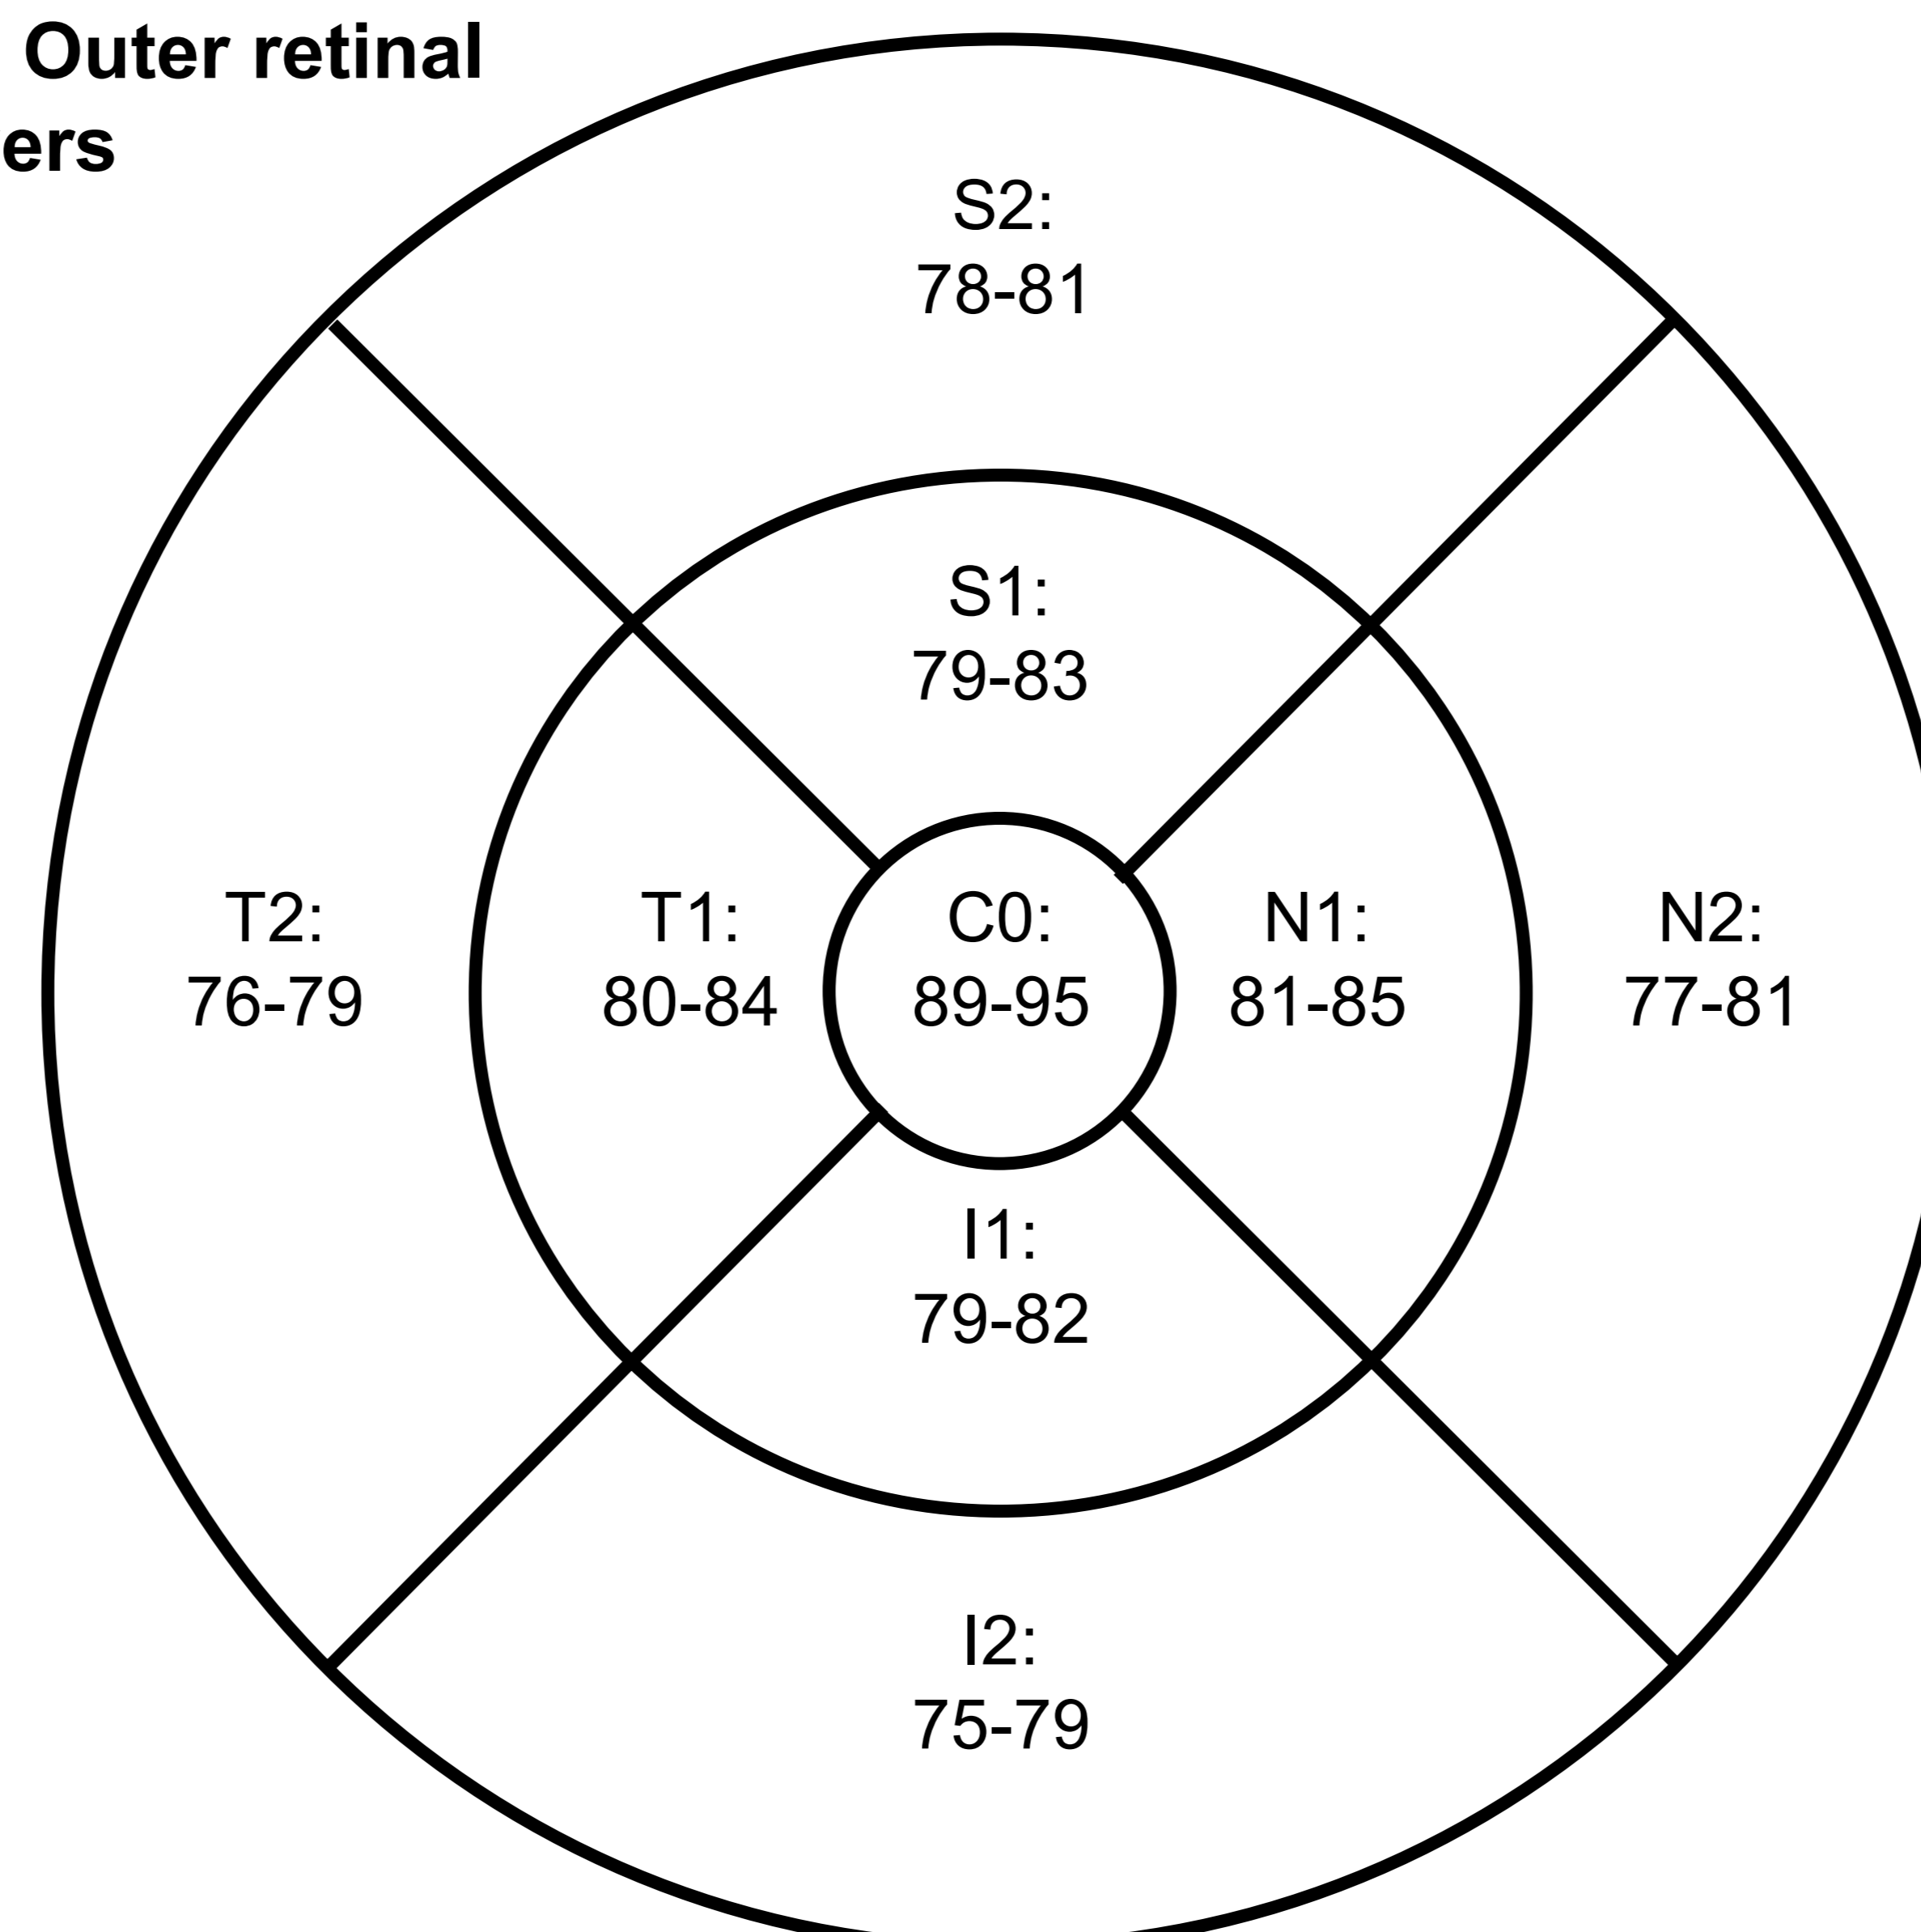

(B) Ganglion cell-inner plexiform layer

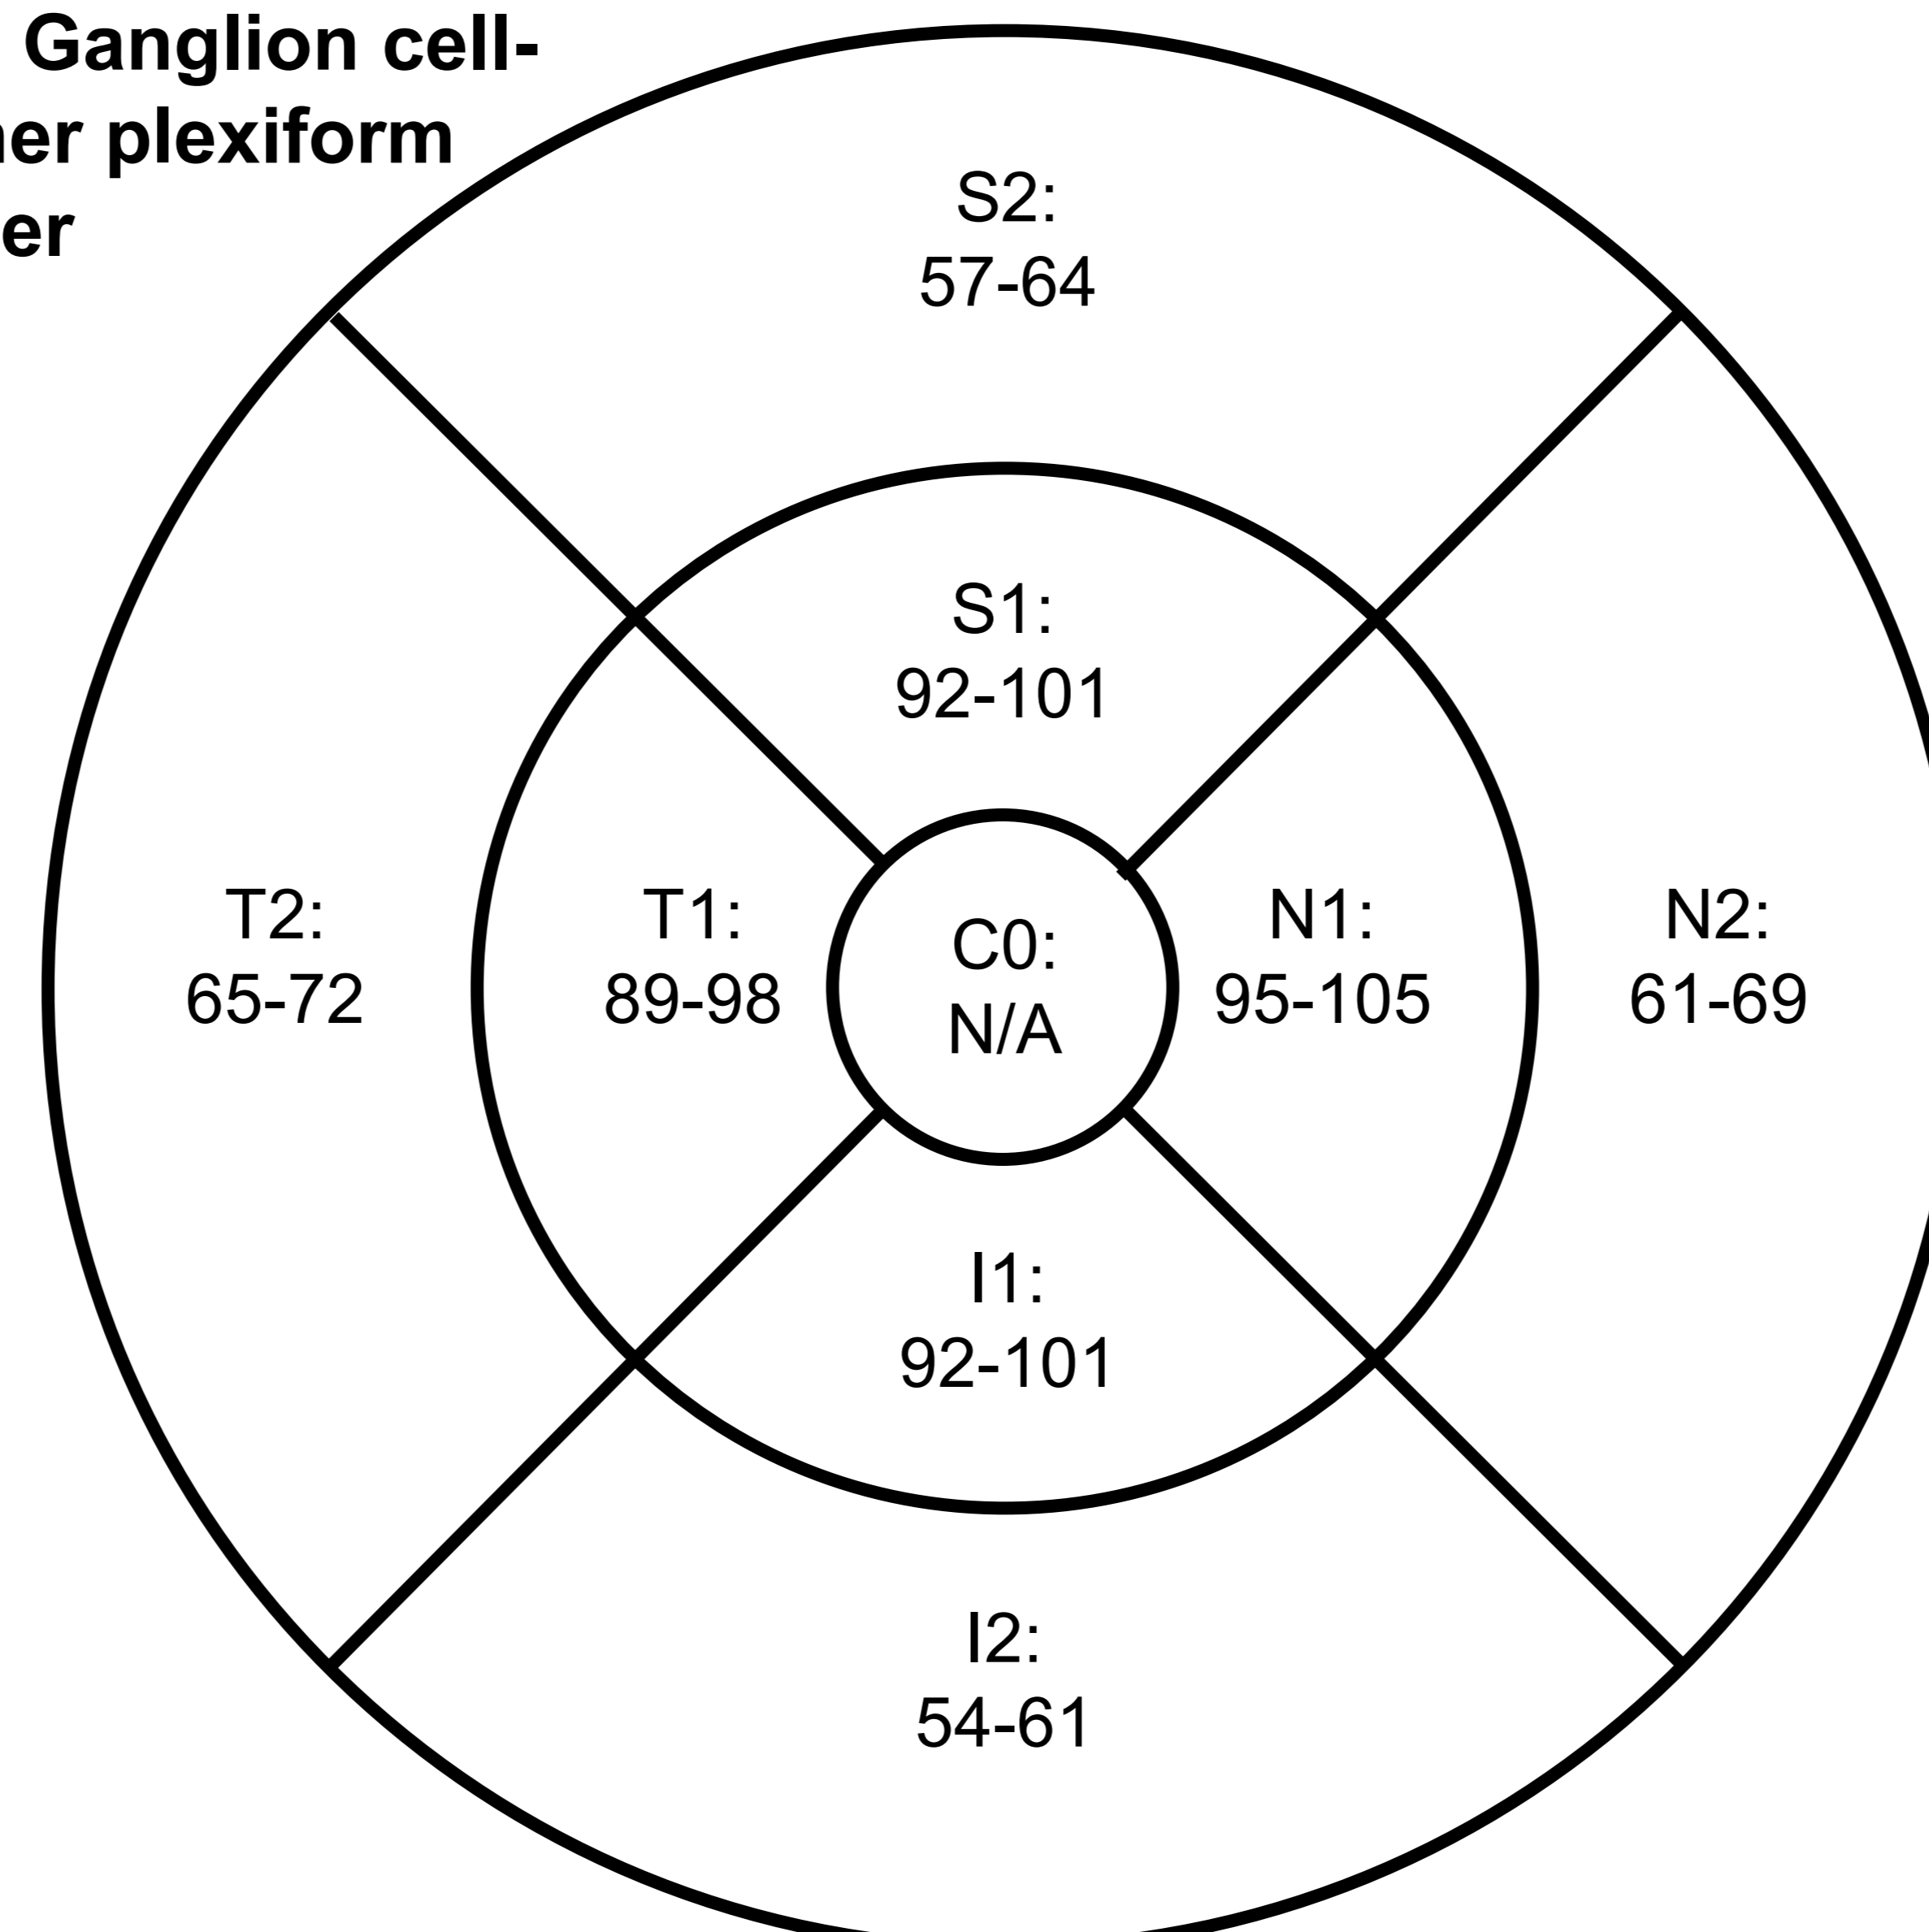

**Supplementary Figure S1.** Left: Median thicknesses and 95% confidence interval; and Right: Interquartile range of the: (a) full retina, (b) outer retinal layers, and (c) ganglion cell-inner plexiform layer at the central macula (0.5 mm radius around the fovea), inner macular (region between 0.5 and 1.5 mm radius around the fovea; S1, T1, I1, and N1), and outer macula (regions between 1.5 and 3.0 mm radius around the fovea; S2, T2, I2, and N2). N/A= Not applicable
