# Supplementary material for: Macular Thickness Profile and Its Association With Best-Corrected Visual Acuity in Healthy Young Adults
Source: PubMed Central journal article supplement (PMC7961121; doi:10.1167/tvst.10.3.8), 2021-03-10
Supplement: tvst-10-3-8_s003.pdf [file tvst-10-3-8_s003.pdf]

**Supplementary Table S7.** Association of best-corrected visual acuity per 100µm increased in full retinal thickness and per 20 µm increased in outer retinal layers thickness at the macula

| Macular region                                              | All participants (n=1604)     |               |              | KYAMS (n= 297)        |               |          | Raine Study (n=1307)  |               |          |
|-------------------------------------------------------------|-------------------------------|---------------|--------------|-----------------------|---------------|----------|-----------------------|---------------|----------|
|                                                             | Estimate [95%CI]              | Wald $\chi^2$ | p-value*     | Estimate [95%CI]      | Wald $\chi^2$ | p-value* | Estimate [95%CI]      | Wald $\chi^2$ | p-value* |
| <b>Full retinal thickness (per 100µm increase)</b>          |                               |               |              |                       |               |          |                       |               |          |
| C0                                                          | <b>-0.02 [-0.04 to 0.00]</b>  | <b>5.8</b>    | <b>0.016</b> | -0.00 [-0.04 to 0.03] | 0.0           | 0.91     | -0.00 [-0.04 to 0.03] | 0.0           | 0.91     |
| S1                                                          | -0.02 [-0.05 to 0.00]         | 3.9           | 0.05         | -0.00 [-0.05 to 0.05] | 0.0           | 0.89     | -0.00 [-0.05 to 0.05] | 0.0           | 0.89     |
| S2                                                          | -0.02 [-0.05 to 0.00]         | 3.3           | 0.07         | -0.02 [-0.07 to 0.04] | 0.4           | 0.51     | -0.02 [-0.07 to 0.04] | 0.4           | 0.51     |
| I1                                                          | <b>-0.03 [-0.05 to -0.01]</b> | <b>6.3</b>    | <b>0.012</b> | -0.00 [-0.05 to 0.05] | 0.0           | 0.99     | -0.00 [-0.05 to 0.05] | 0.0           | 0.99     |
| I2                                                          | -0.02 [-0.04 to 0.01]         | 1.7           | 0.19         | -0.01 [-0.05 to 0.04] | 0.0           | 0.83     | -0.01 [-0.05 to 0.04] | 0.0           | 0.83     |
| T1                                                          | <b>-0.03 [-0.06 to -0.01]</b> | <b>6.0</b>    | <b>0.014</b> | -0.01 [-0.06 to 0.05] | 0.1           | 0.80     | -0.01 [-0.06 to 0.05] | 0.1           | 0.80     |
| T2                                                          | <b>-0.03 [-0.06 to -0.01]</b> | <b>7.1</b>    | <b>0.008</b> | -0.00 [-0.06 to 0.06] | 0.0           | 0.97     | -0.00 [-0.06 to 0.06] | 0.0           | 0.97     |
| N1                                                          | -0.02 [-0.04 to 0.00]         | 3.2           | 0.07         | -0.01 [-0.06 to 0.04] | 0.1           | 0.73     | -0.01 [-0.06 to 0.04] | 0.1           | 0.73     |
| N2                                                          | -0.01 [-0.03 to 0.01]         | 0.8           | 0.38         | -0.02 [-0.06 to 0.03] | 0.0           | 0.54     | -0.02 [-0.06 to 0.03] | 0.4           | 0.54     |
| <b>Outer retinal layers thickness (per 100 µm increase)</b> |                               |               |              |                       |               |          |                       |               |          |
| C0                                                          | -0.06 [-0.14 to 0.02]         | 2.5           | 0.117        | -0.02 [-0.26 to 0.22] | 0.0           | 0.89     | -0.07 [-0.15 to 0.01] | 2.7           | 0.10     |
| S1                                                          | -0.11 [-0.25 to 0.03]         | 2.3           | 0.128        | -0.02 [-0.44 to 0.40] | 0.0           | 0.93     | -0.13 [-0.27 to 0.02] | 2.8           | 0.09     |
| S2                                                          | -0.14 [-0.29 to 0.00]         | 3.8           | 0.053        | -0.10 [-0.48 to 0.29] | 0.2           | 0.62     | -0.15 [-0.31 to 0.00] | 3.7           | 0.06     |
| I1                                                          | -0.07 [-0.20 to 0.07]         | 1.0           | 0.326        | -0.04 [-0.39 to 0.30] | 0.1           | 0.80     | -0.07 [-0.21 to 0.07] | 0.9           | 0.34     |
| I2                                                          | -0.07 [-0.22 to 0.07]         | 1.0           | 0.319        | -0.20 [-0.50 to 0.10] | 1.7           | 0.19     | -0.04 [-0.21 to 0.12] | 0.3           | 0.61     |
| T1                                                          | -0.13 [-0.25 to -0.01]        | 4.5           | 0.033        | -0.15 [-0.53 to 0.24] | 0.6           | 0.45     | -0.13 [-0.25 to 0.00] | 4.0           | 0.05     |

|    |                        |     |              |                       |     |      |                        |     |             |
|----|------------------------|-----|--------------|-----------------------|-----|------|------------------------|-----|-------------|
| T2 | -0.16 [-0.30 to -0.01] | 4.4 | <b>0.037</b> | -0.07 [-0.45 to 0.30] | 0.1 | 0.71 | -0.17 [-0.33 to -0.01] | 4.5 | <b>0.03</b> |
| N1 | -0.09 [-0.21 to 0.03]  | 2.1 | 0.145        | -0.03 [-0.42 to 0.36] | 0.0 | 0.88 | -0.10 [-0.23 to 0.03]  | 2.1 | 0.15        |
| N2 | -0.10 [-0.23 to 0.03]  | 2.1 | 0.144        | -0.16 [-0.45 to 0.13] | 1.1 | 0.29 | -0.08 [-0.22 to 0.07]  | 1.0 | 0.31        |

Corrected for age, sex, ethnicity, and axial length. CI= confidence interval; KYAMS= Kidskin young adult myopia study. \*p<0.017 taken as statistical significance. Significant associations in bold.
