# Supplementary material for: Macular Thickness Profile and Its Association With Best-Corrected Visual Acuity in Healthy Young Adults
Source: PubMed Central journal article supplement (PMC7961121; doi:10.1167/tvst.10.3.8), 2021-03-10

**Supplementary Figure S6:** Best-corrected visual acuity as a function of the full retinal (top) and outer retinal layers (bottom) thicknesses at the central macular (0.5mm radius around the fovea). KYAMS= Kidskin Young Adults Myopia Study; logMAR= logarithm of the minimal angle of resolution

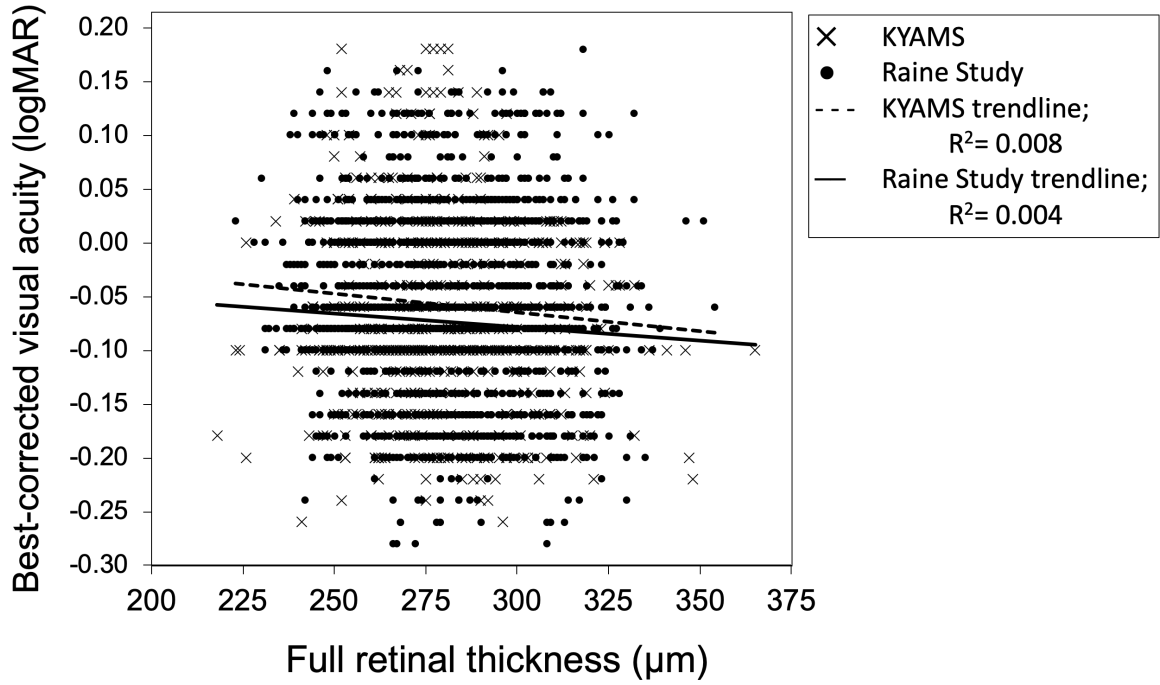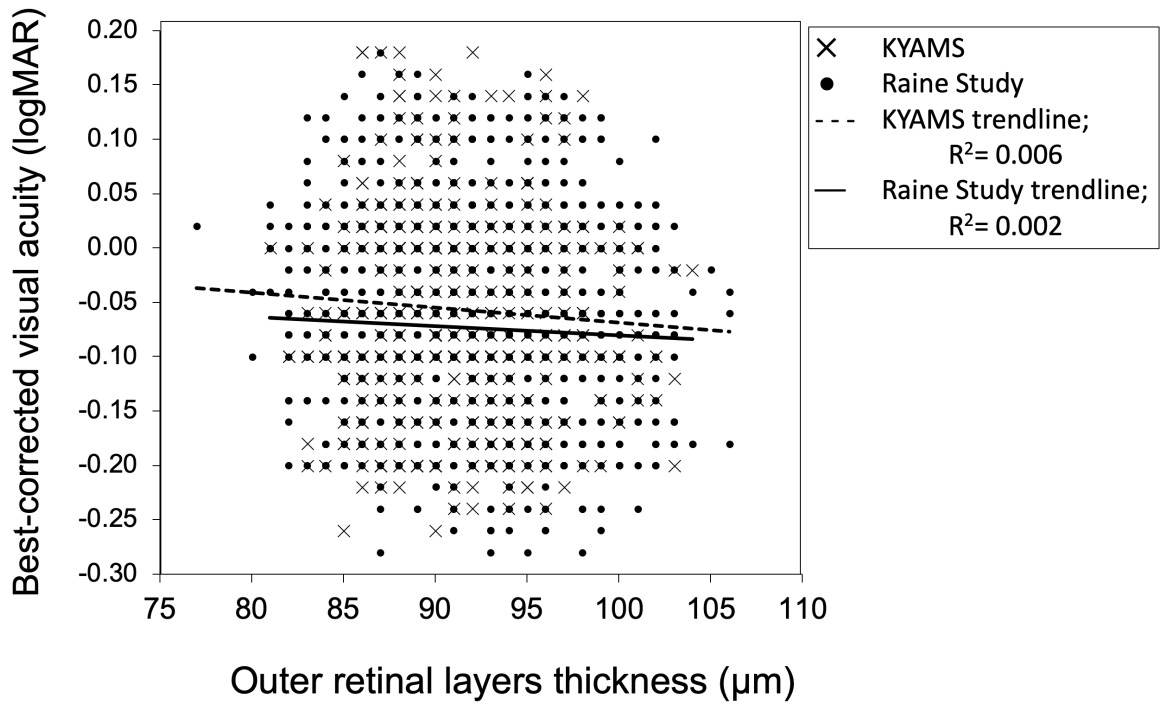

Supplement: tvst-10-3-8_s004.pdf [file tvst-10-3-8_s004.pdf]
